# Supplementary material for: Assessing trial representativeness using serious adverse events: an observational analysis using aggregate and individual-level data from clinical trials and routine healthcare data
Source: PubMed Central journal article supplement (PMC9615407; doi:10.1186/s12916-022-02594-9), 2022-10-28

Additional file 3:  
Supplementary figures S24-S44 -  
Observed/expected SAEs before and after  
standardization by multimorbidity count

Figure S24: observed/expected SAEs before and after standardization by multimorbidity count: asthma trials

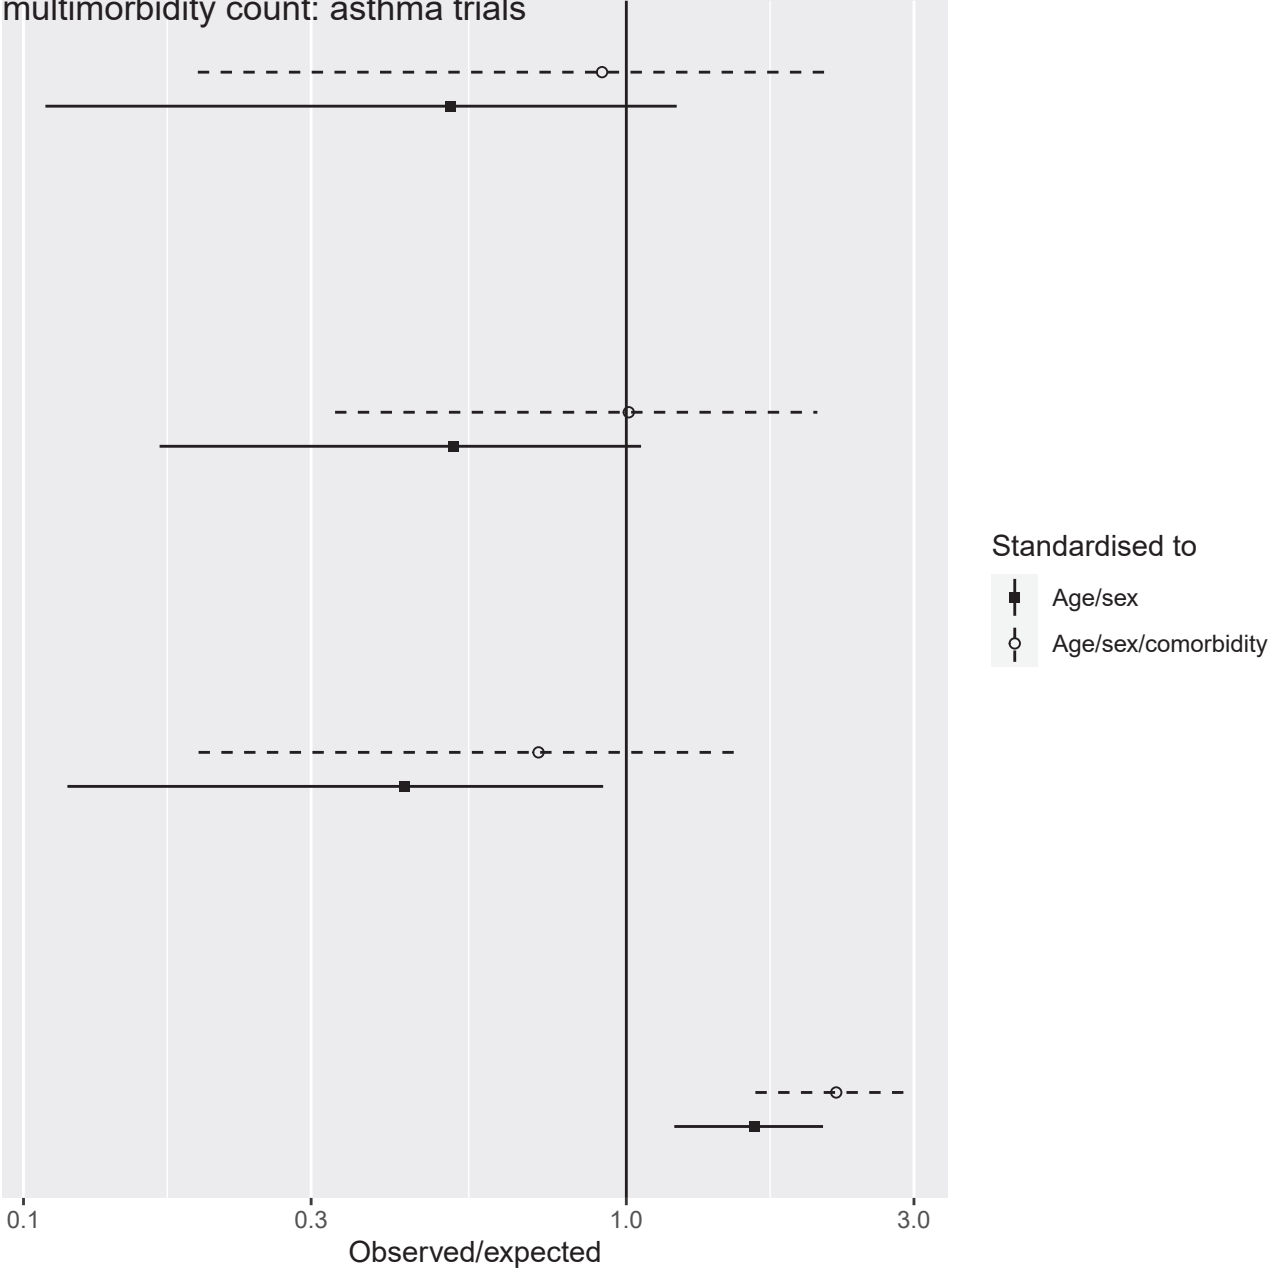

Figure S25: observed/expected SAEs before and after standardization by multimorbidity count: atrial fibrillation trials

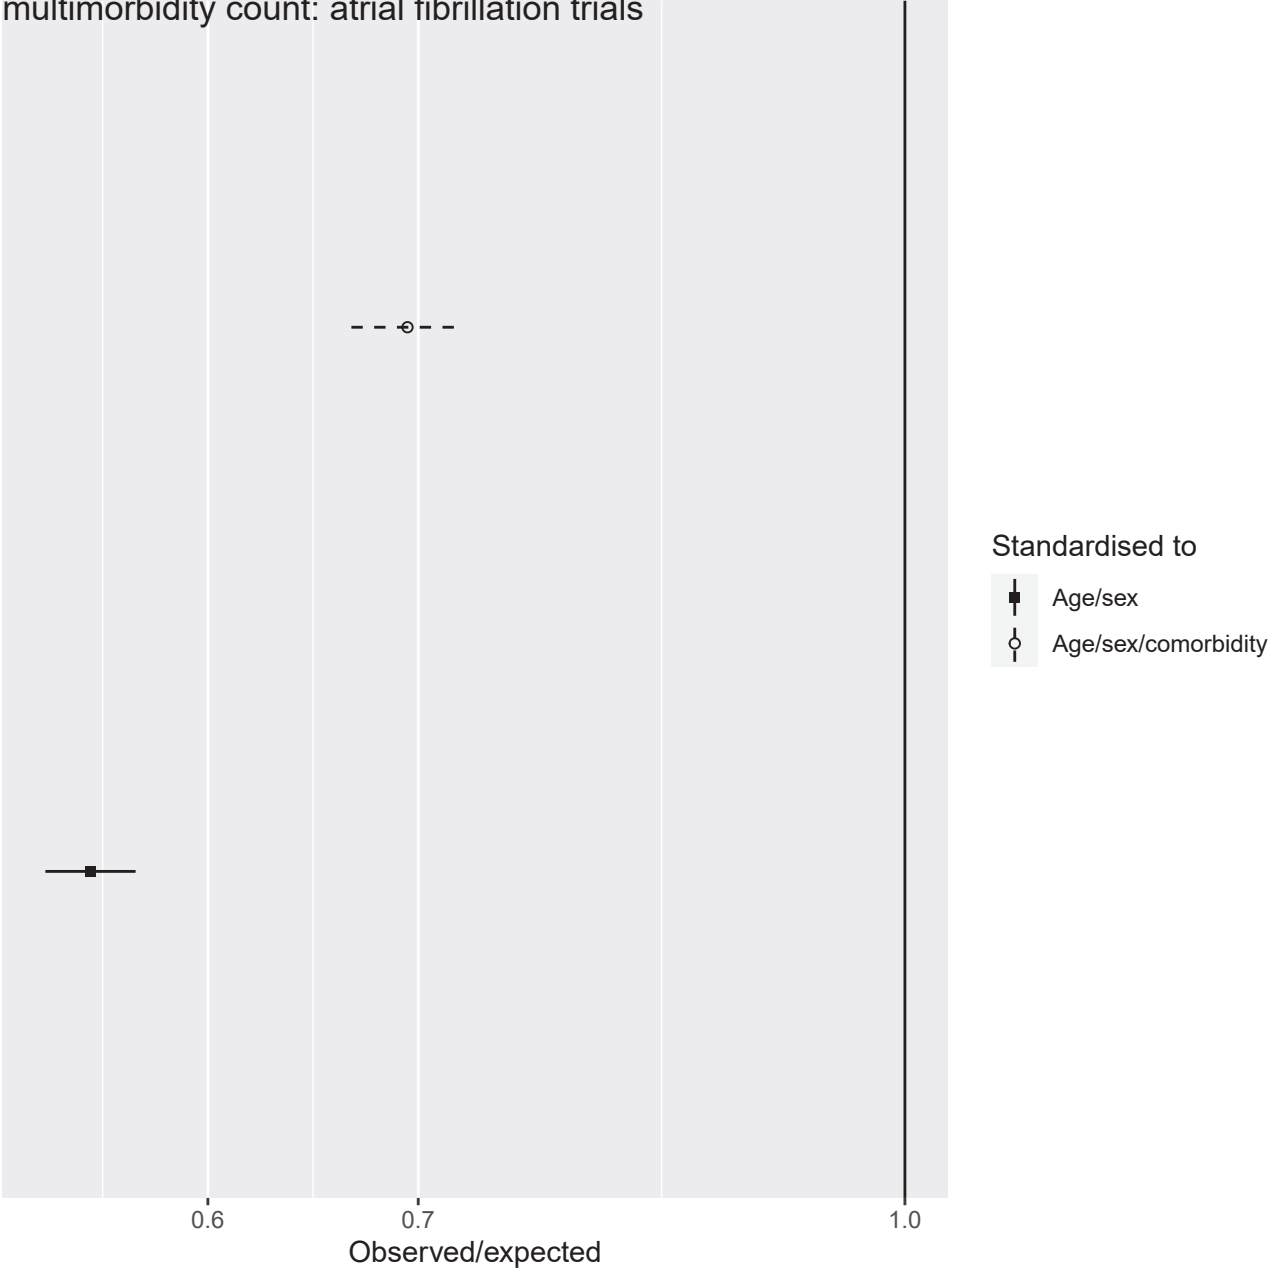

Figure S26: observed/expected SAEs before and after standardization by multimorbidity count: axial spondyloarthritis trials

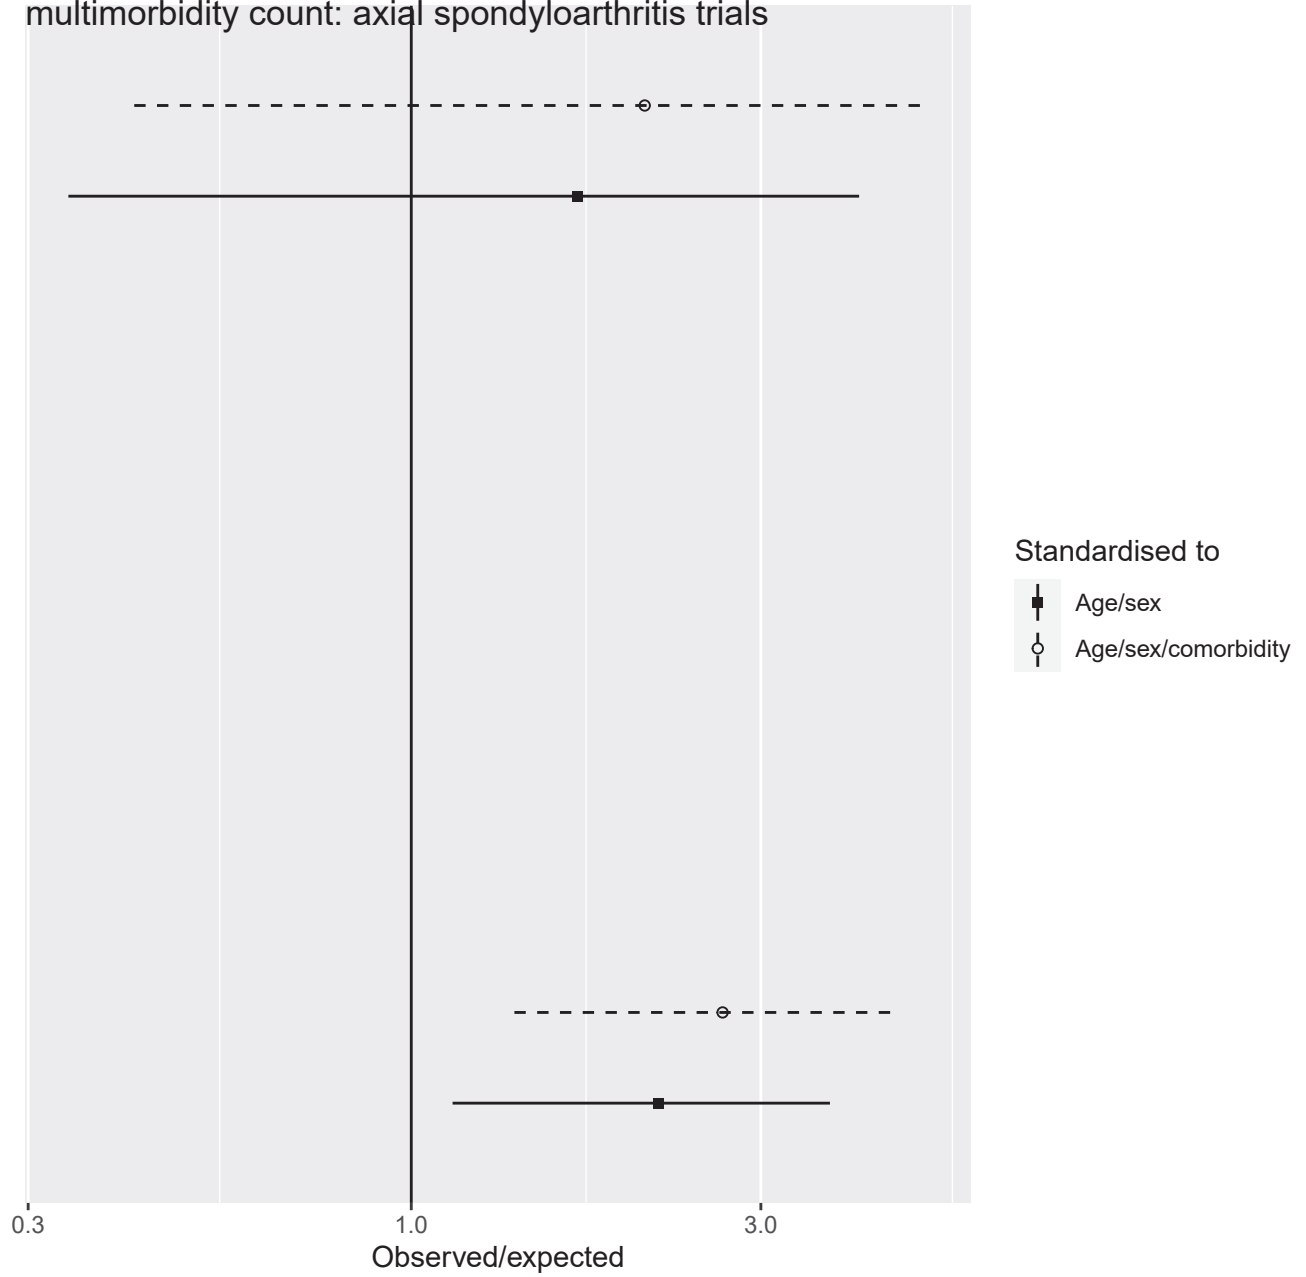

Figure S27: observed/expected SAEs before and after standardization by multimorbidity count: benign prostatic hyperplasia trials

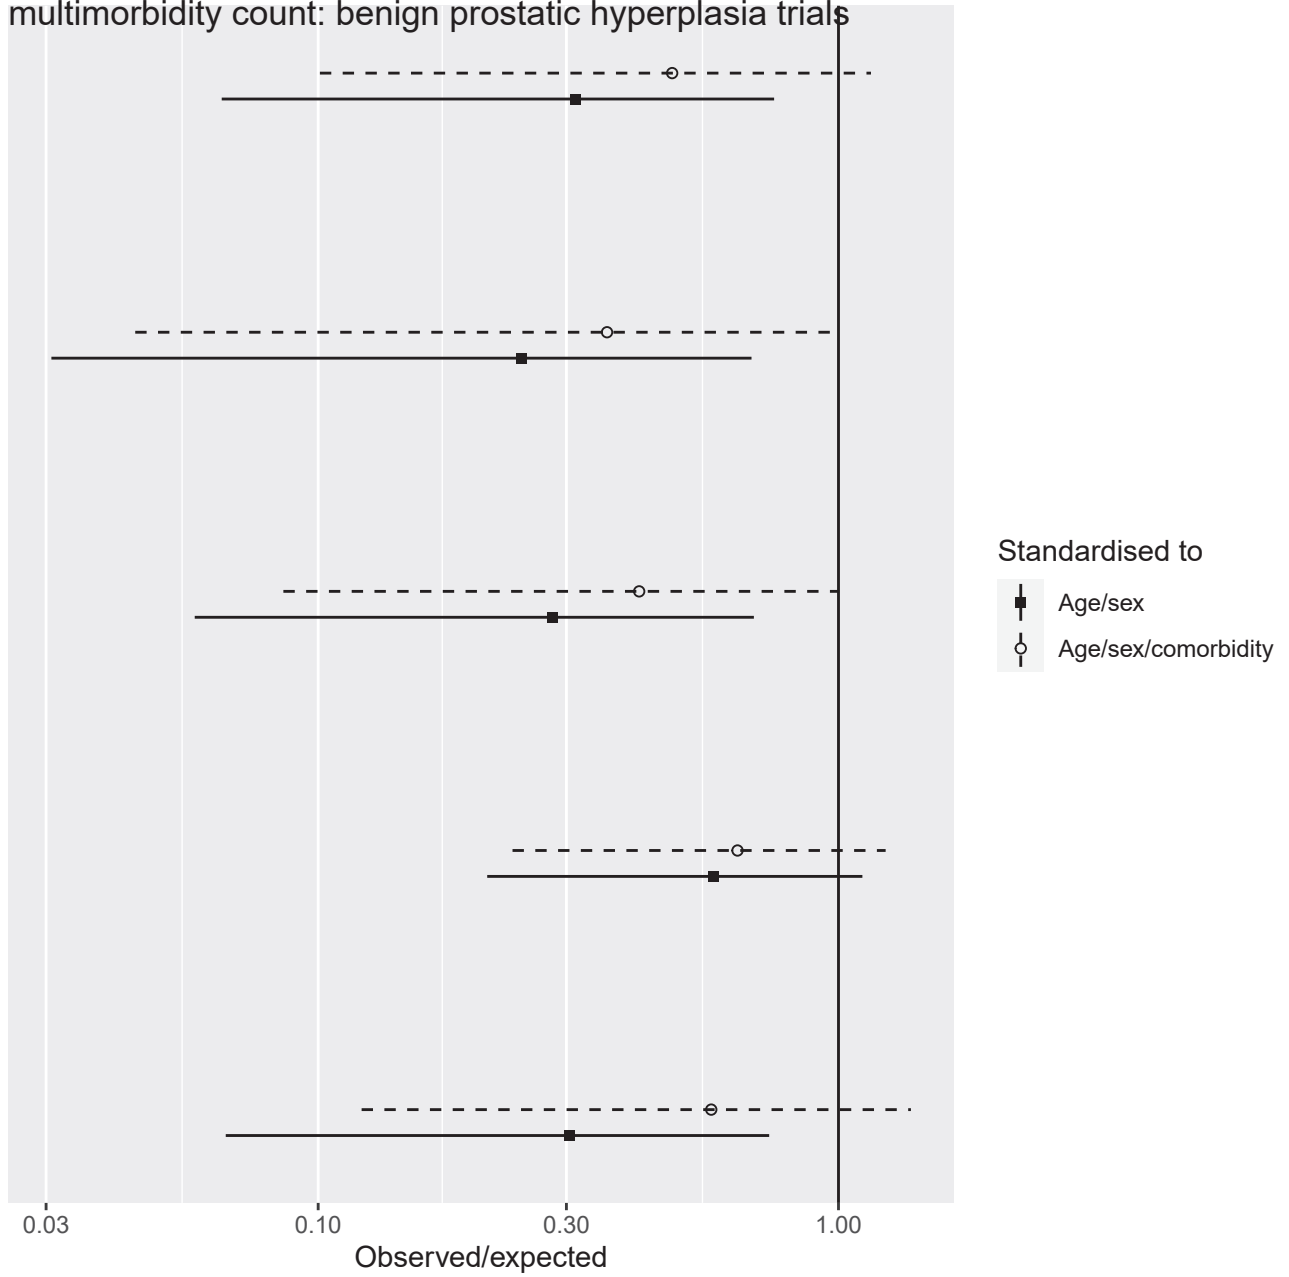

Figure S28: observed/expected SAEs before and after standardization by multimorbidity count: dementia trials

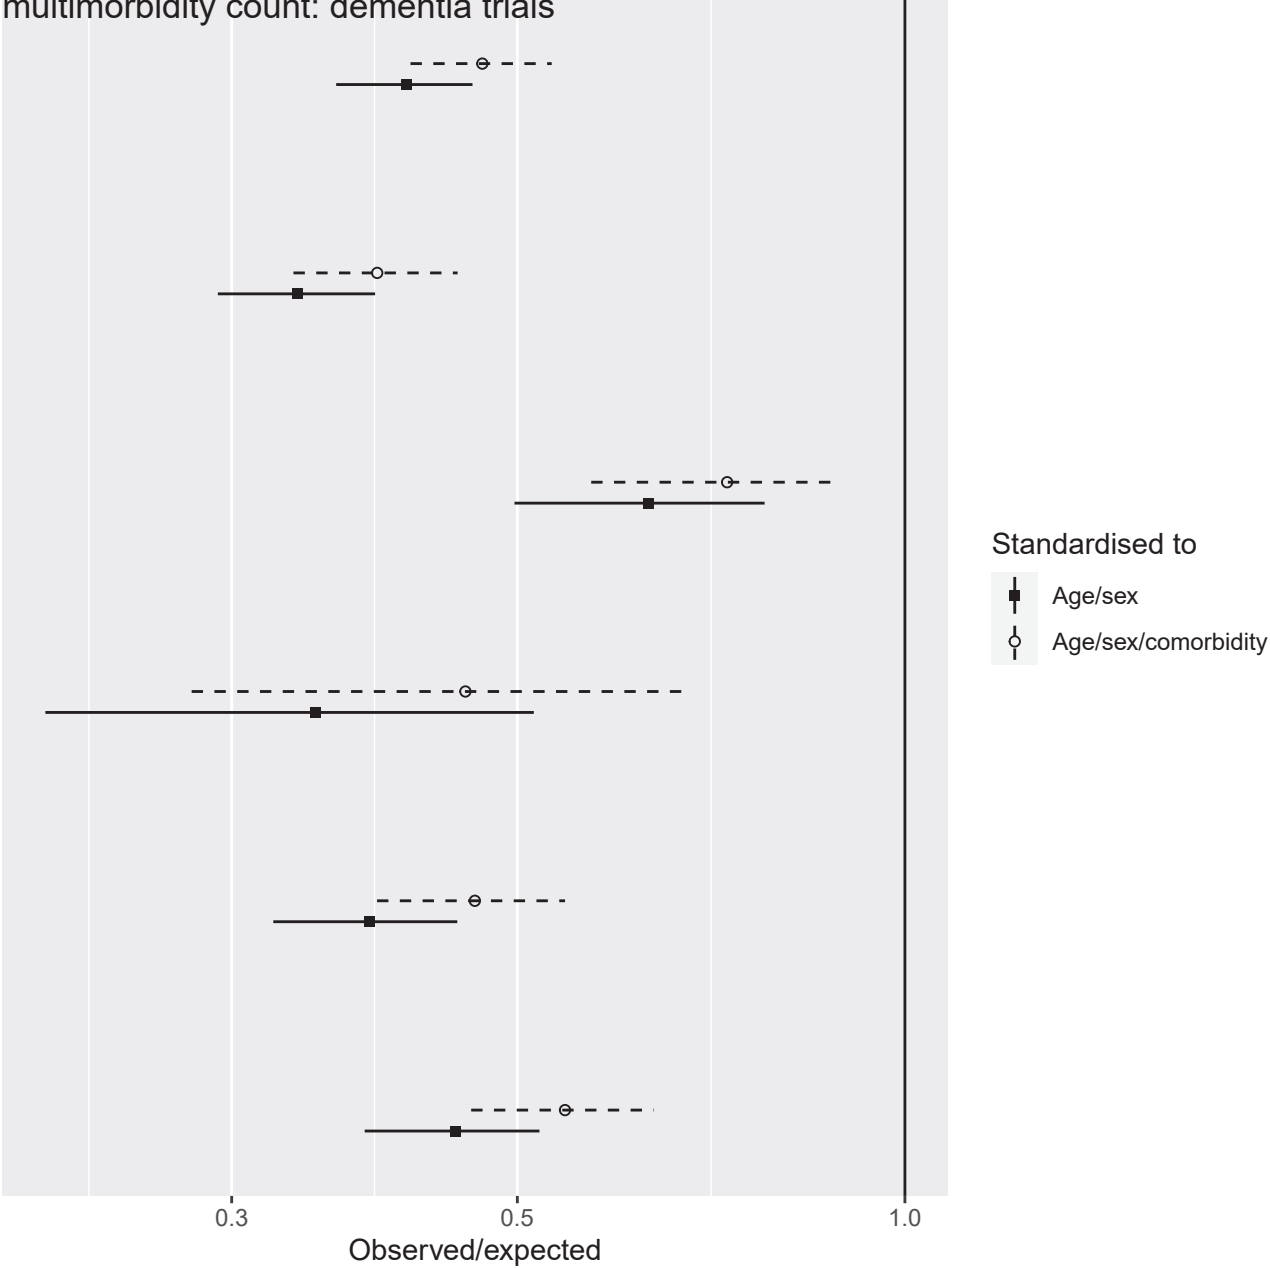

Figure S29: observed/expected SAEs before and after standardization by multimorbidity count: type 2 diabetes mellitus trials

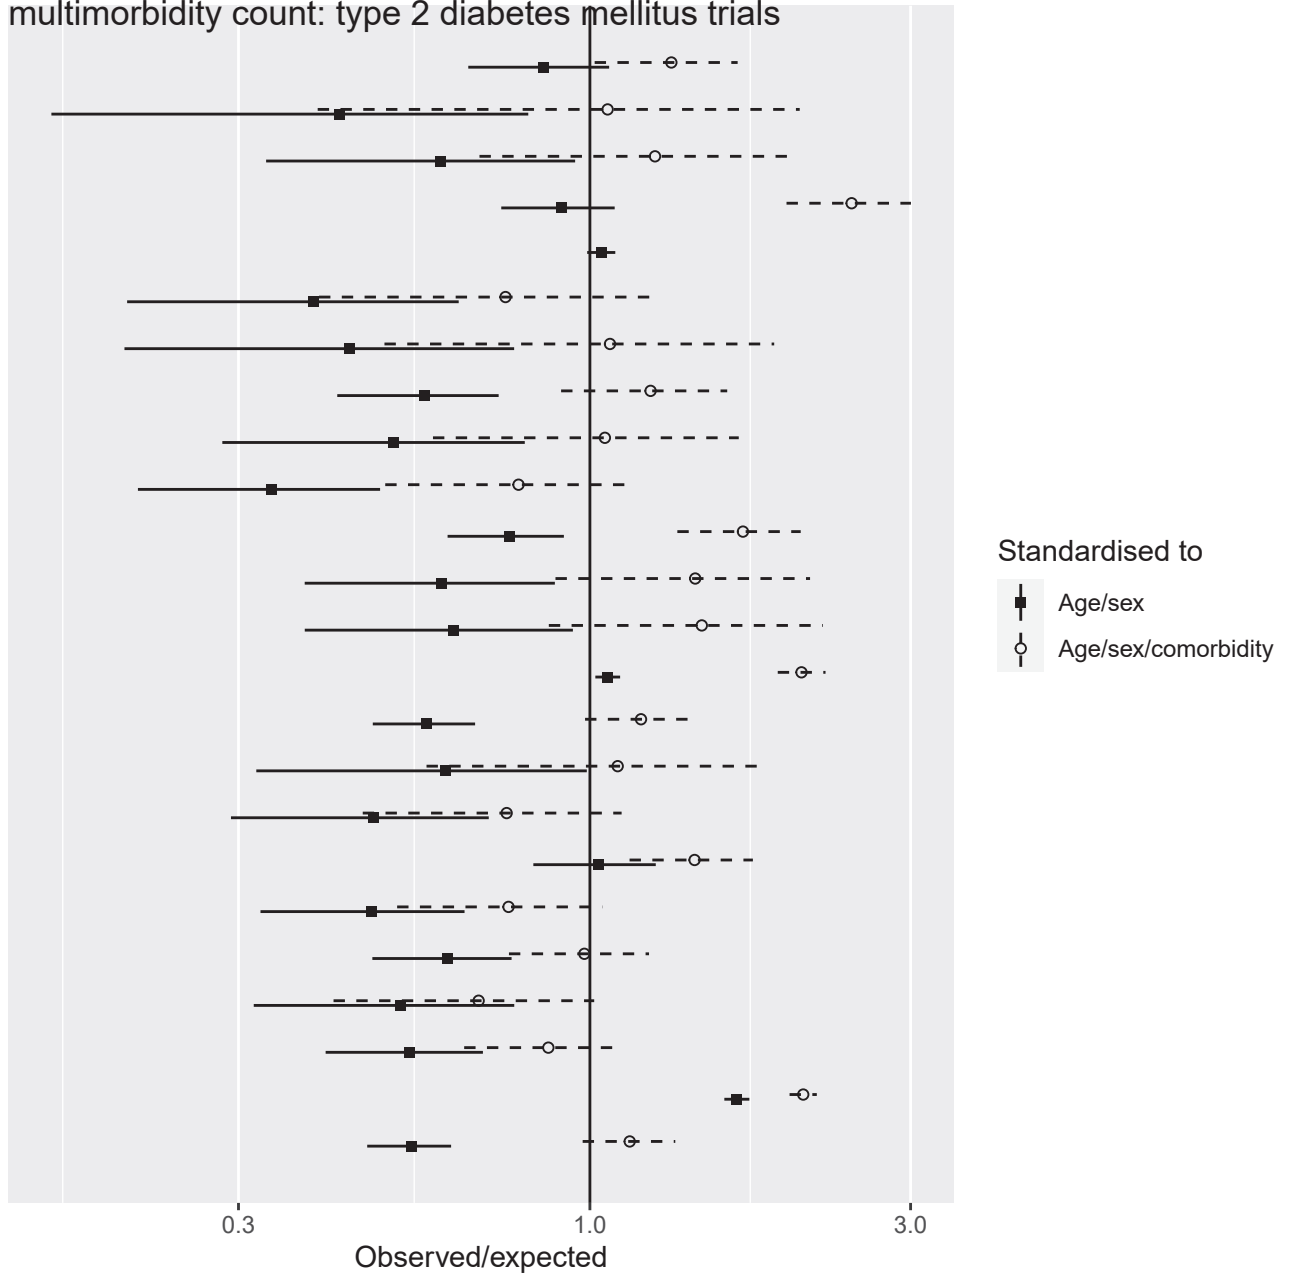

Figure S30: observed/expected SAEs before and after standardization by multimorbidity count: hypertension trials

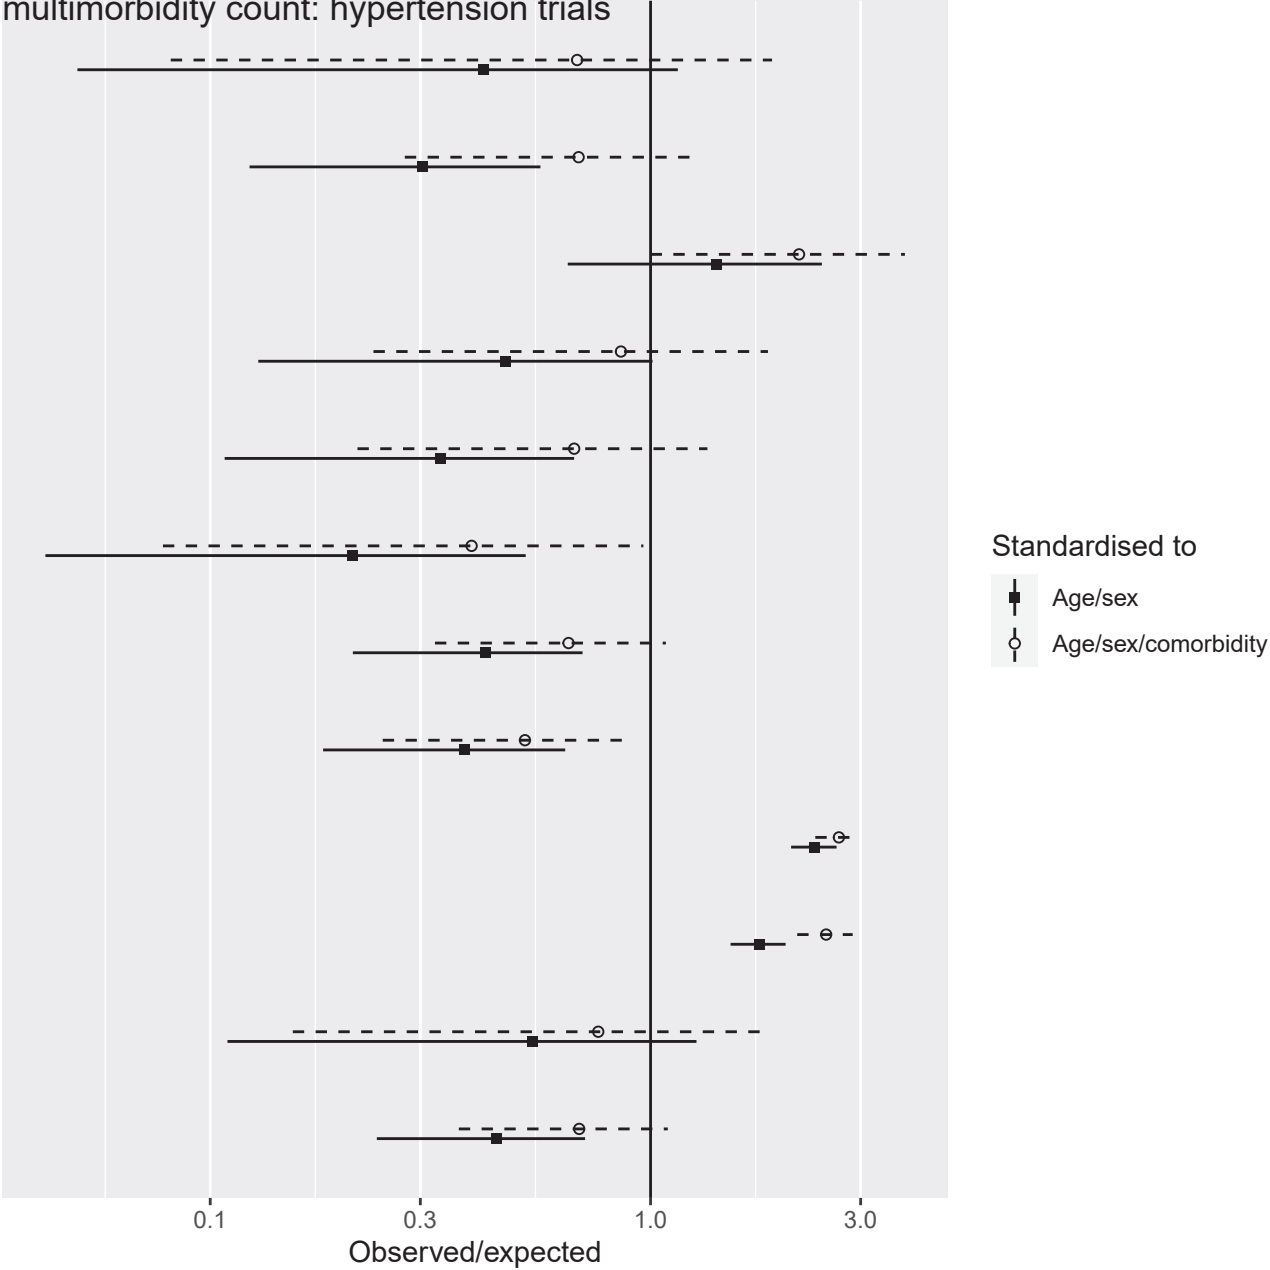



Figure S31: observed/expected SAEs before and after standardization by multimorbidity count: pulmonary hypertension trials

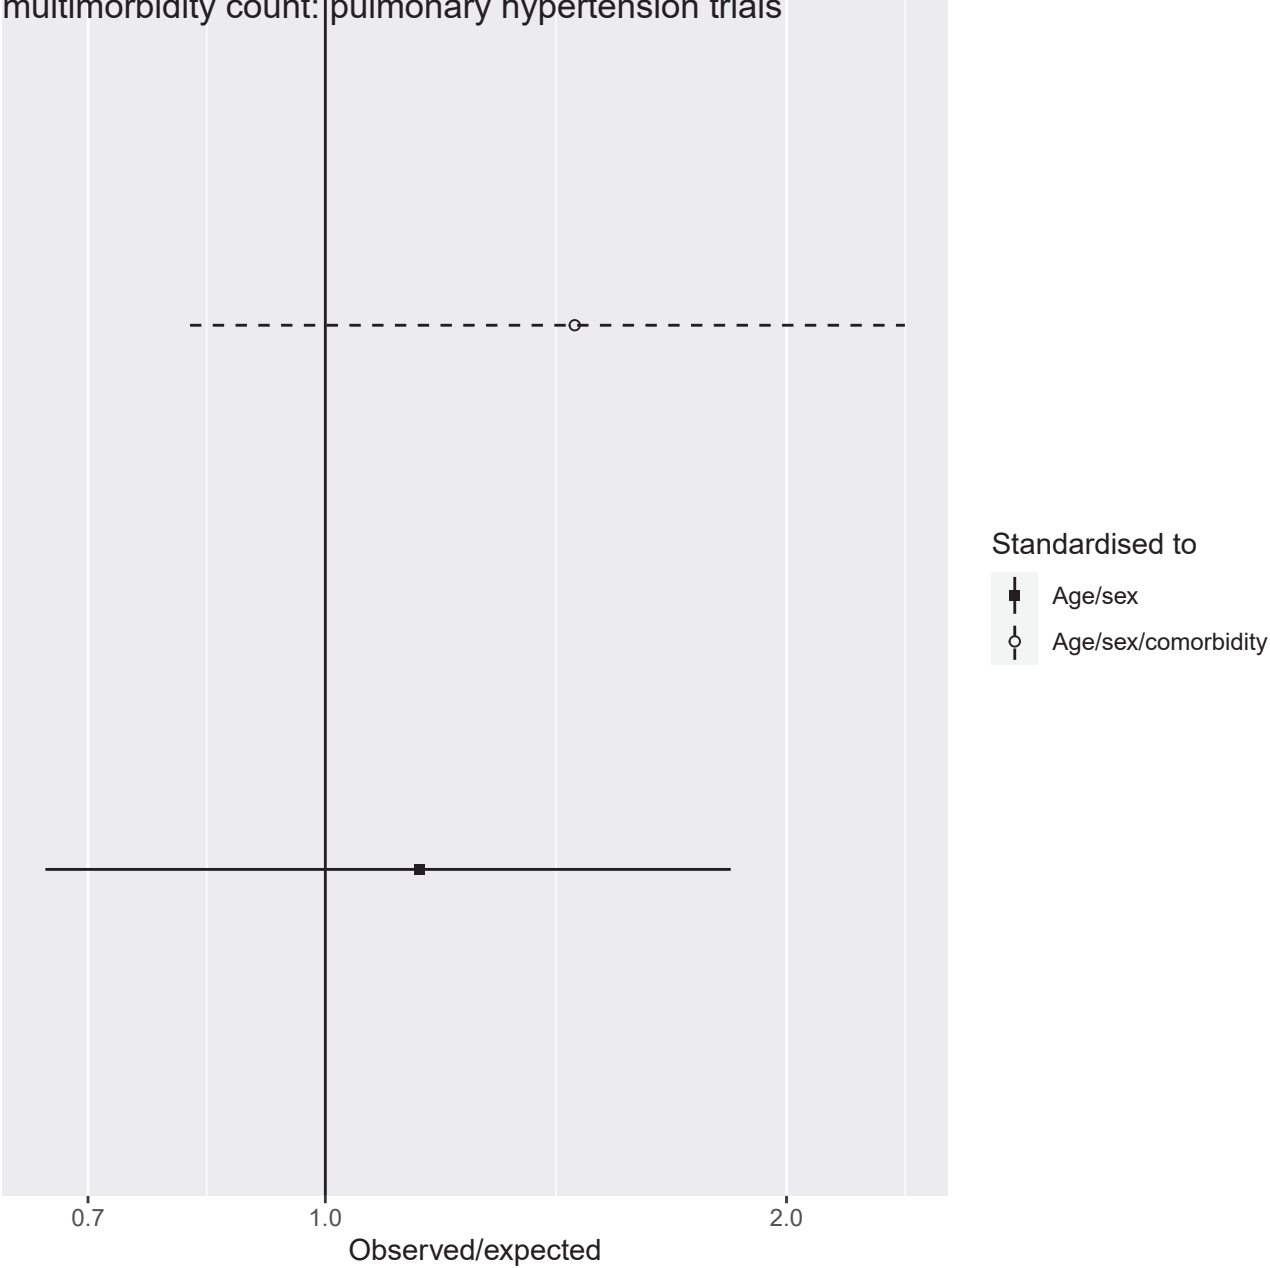

Figure S32: observed/expected SAEs before and after standardization by multimorbidity count: inflammatory bowel disease trials

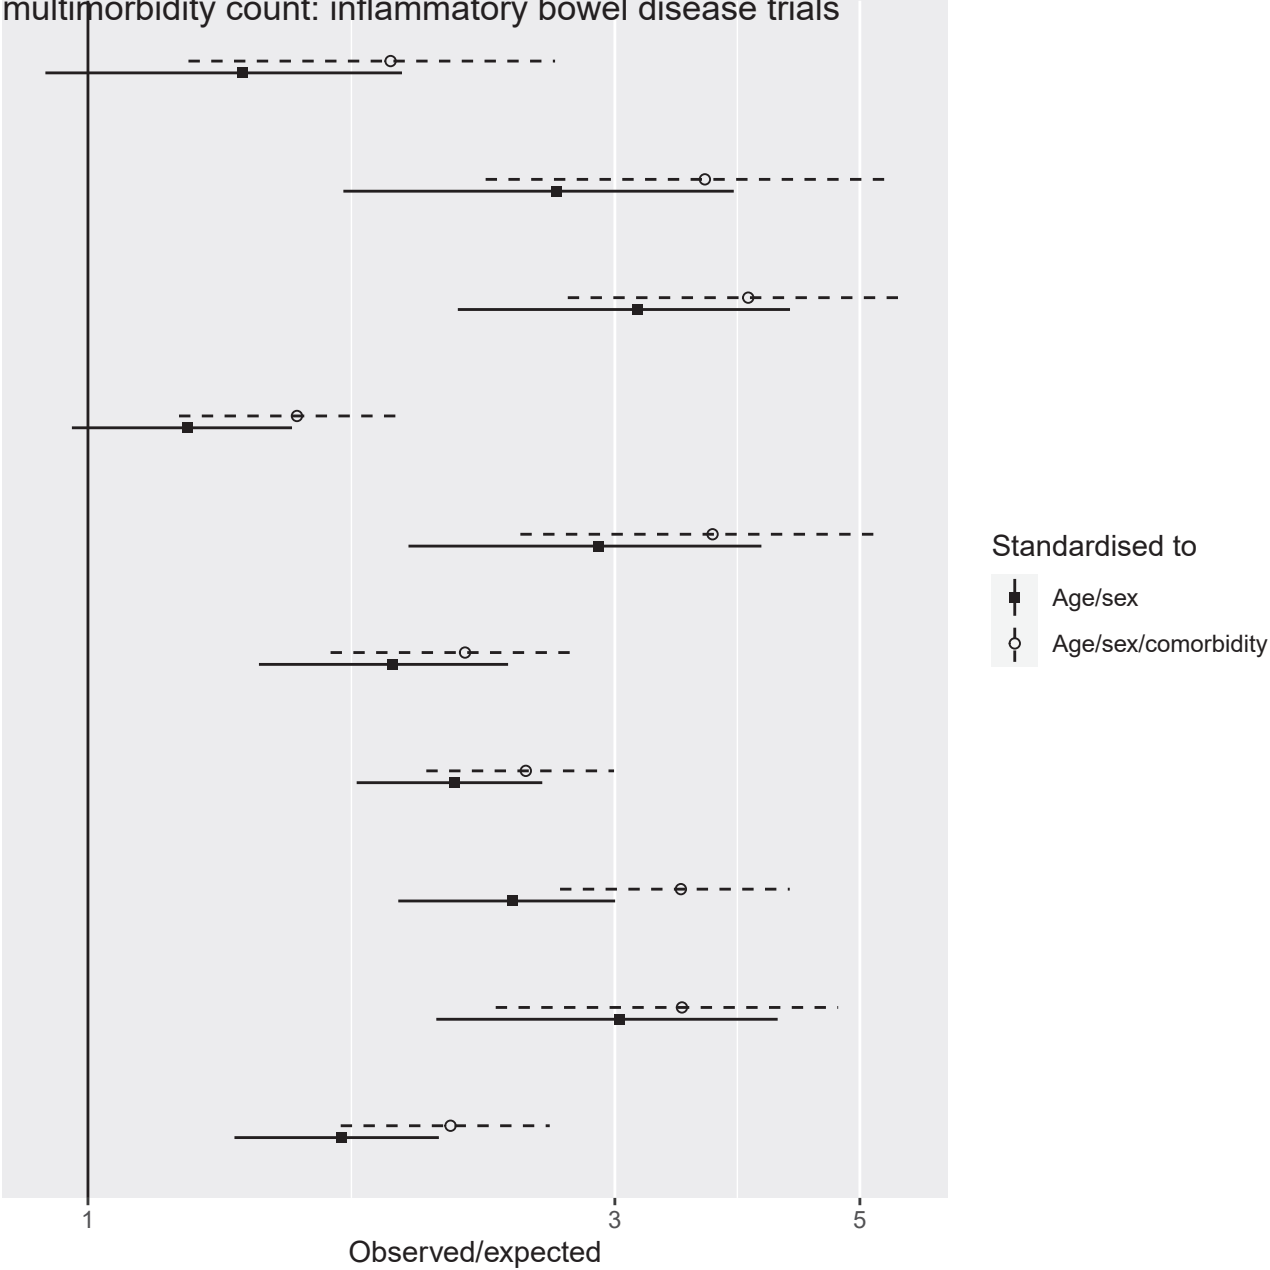

Figure S33: observed/expected SAEs before and after standardization by multimorbidity count: migraine trials

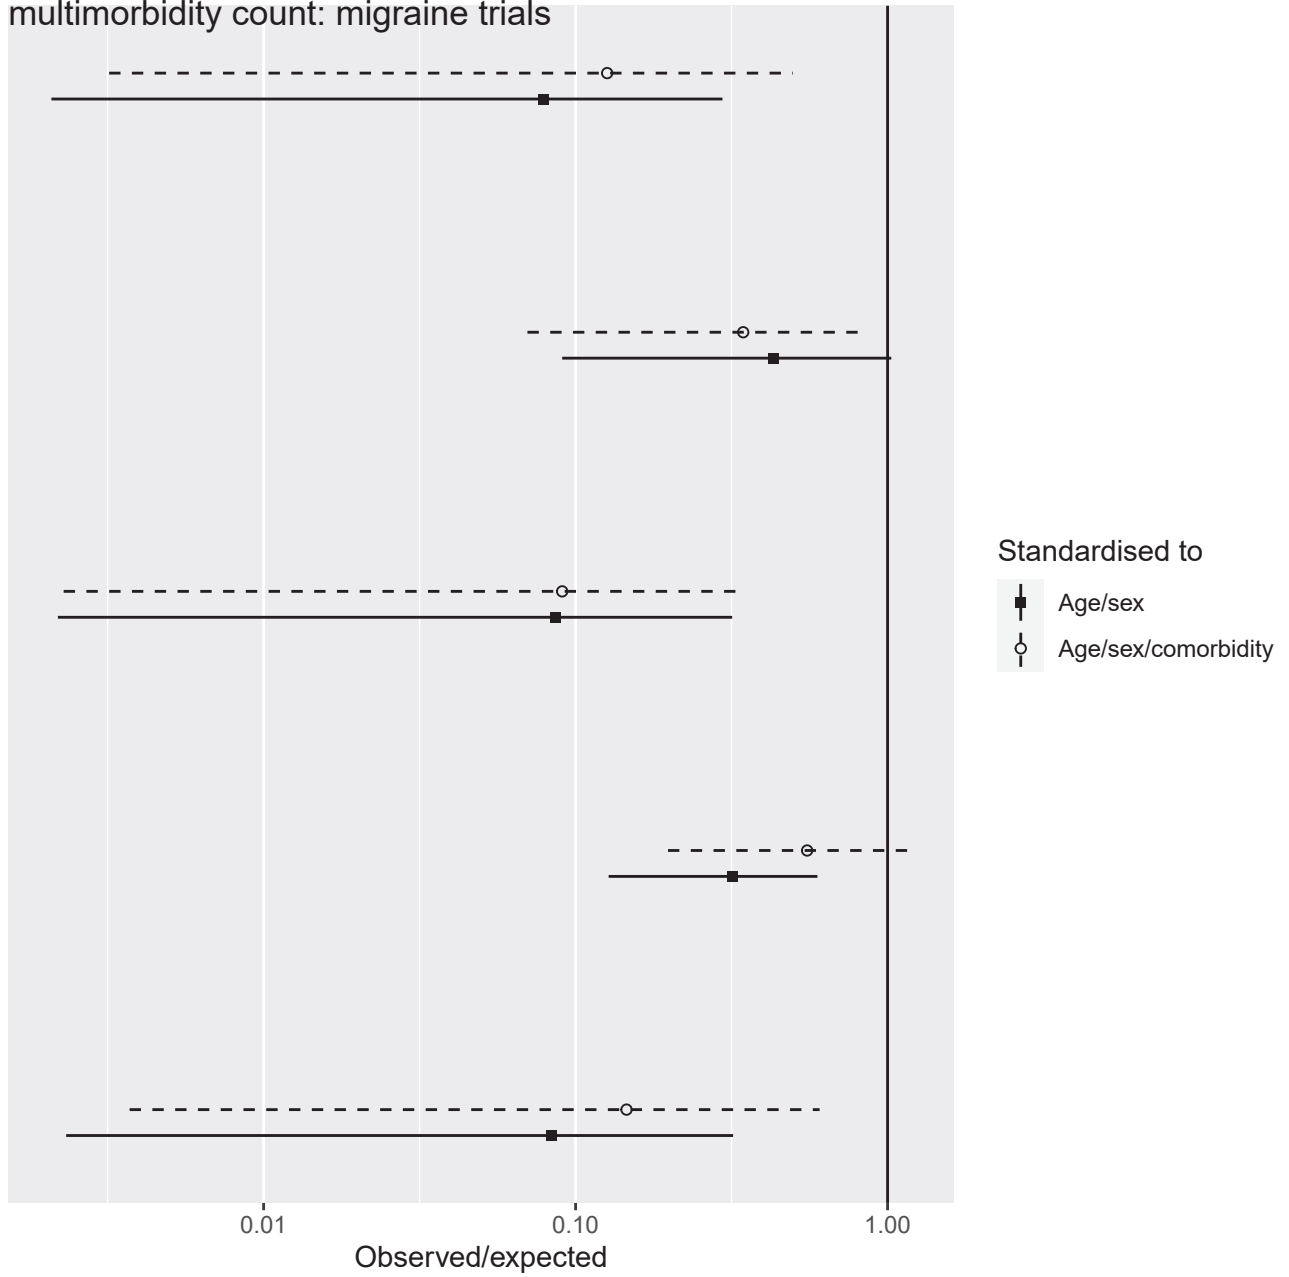

Figure S34: observed/expected SAEs before and after standardization by multimorbidity count: osteoarthritis trials

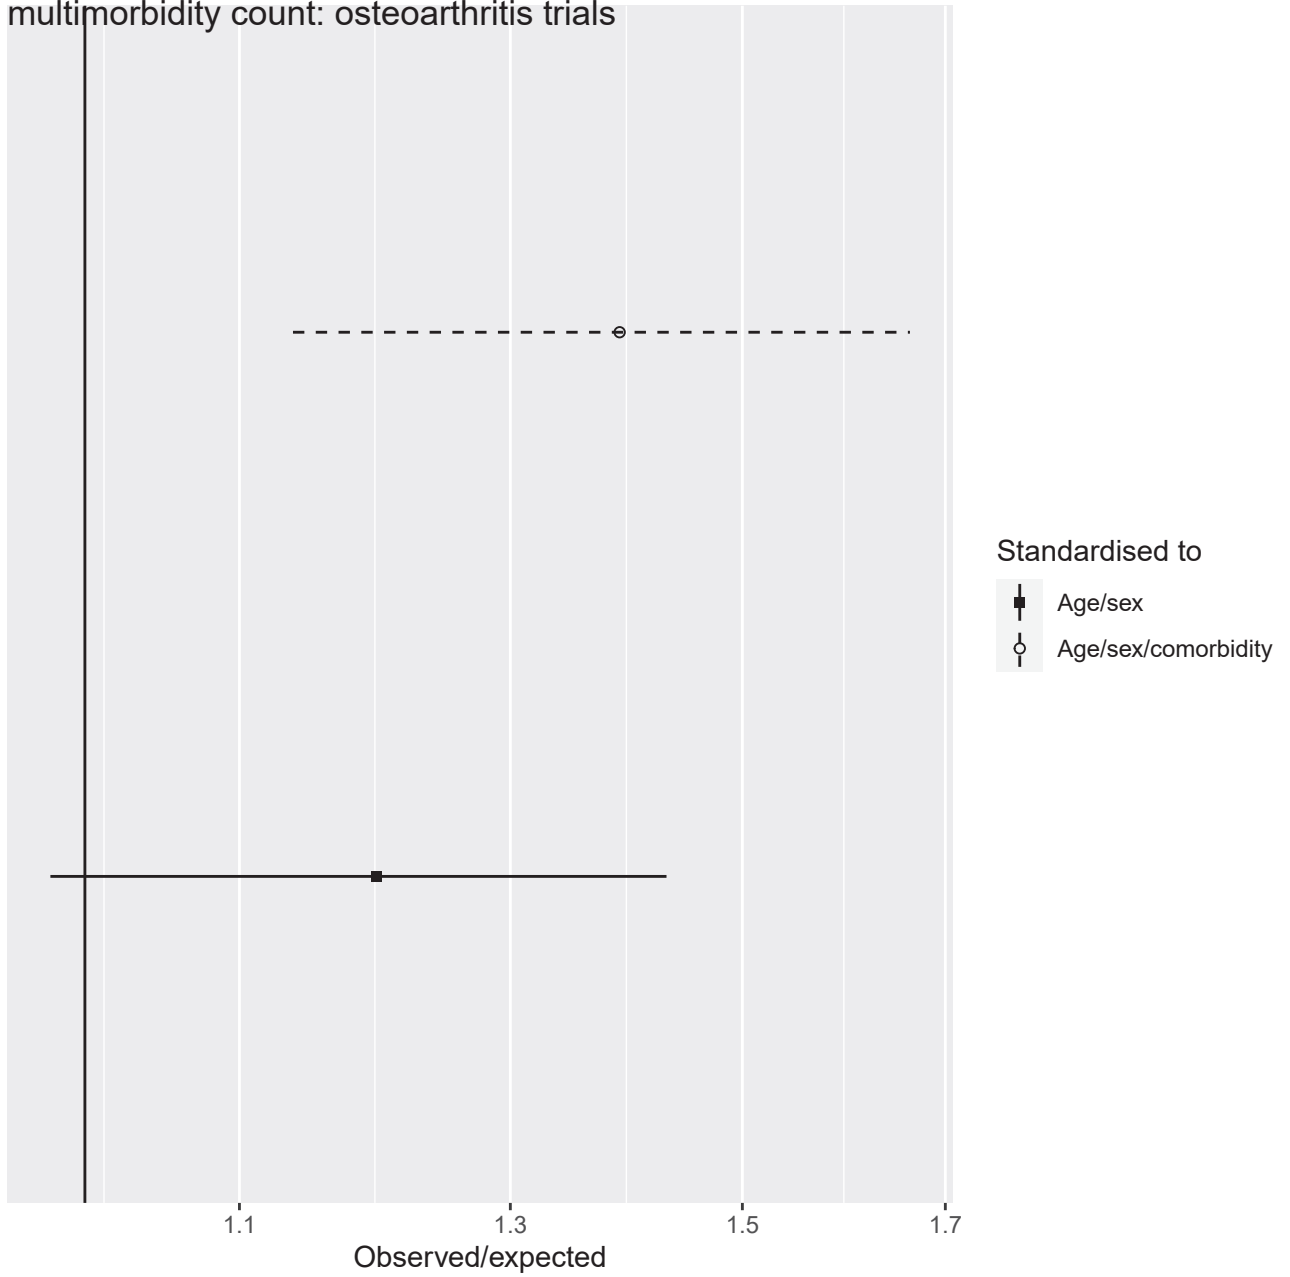

Figure S35: observed/expected SAEs before and after standardization by multimorbidity count: osteoporosis trials

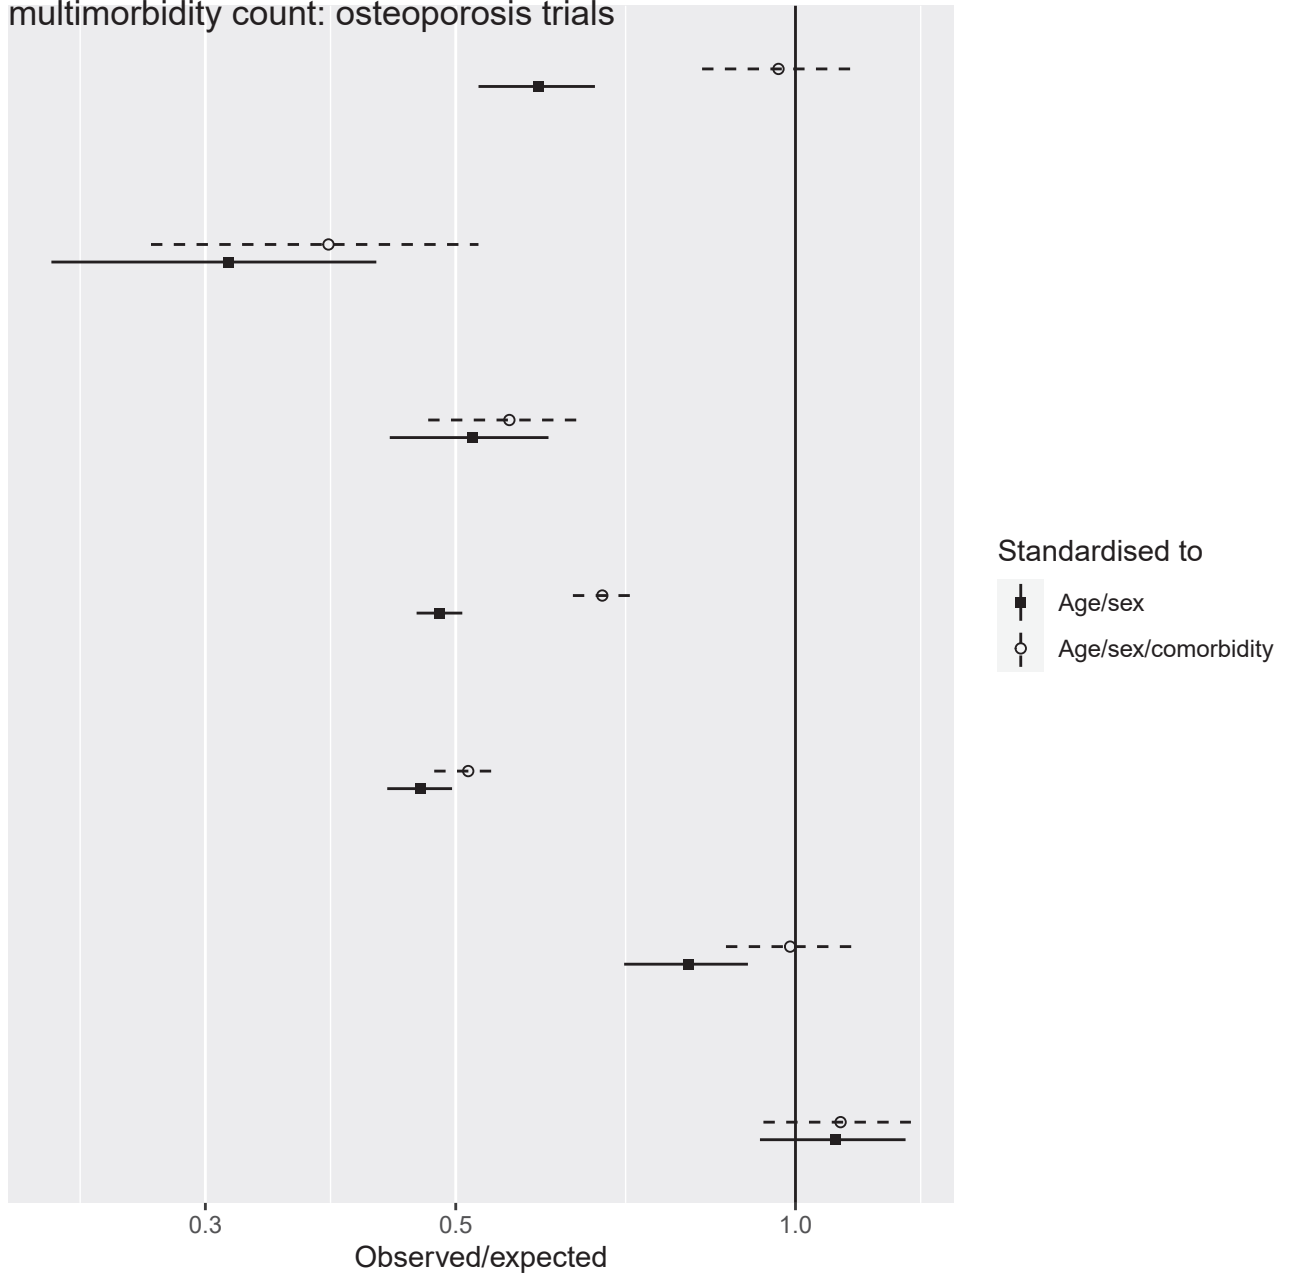

Figure S36: observed/expected SAEs before and after standardization by multimorbidity count: Parkinson's disease trials

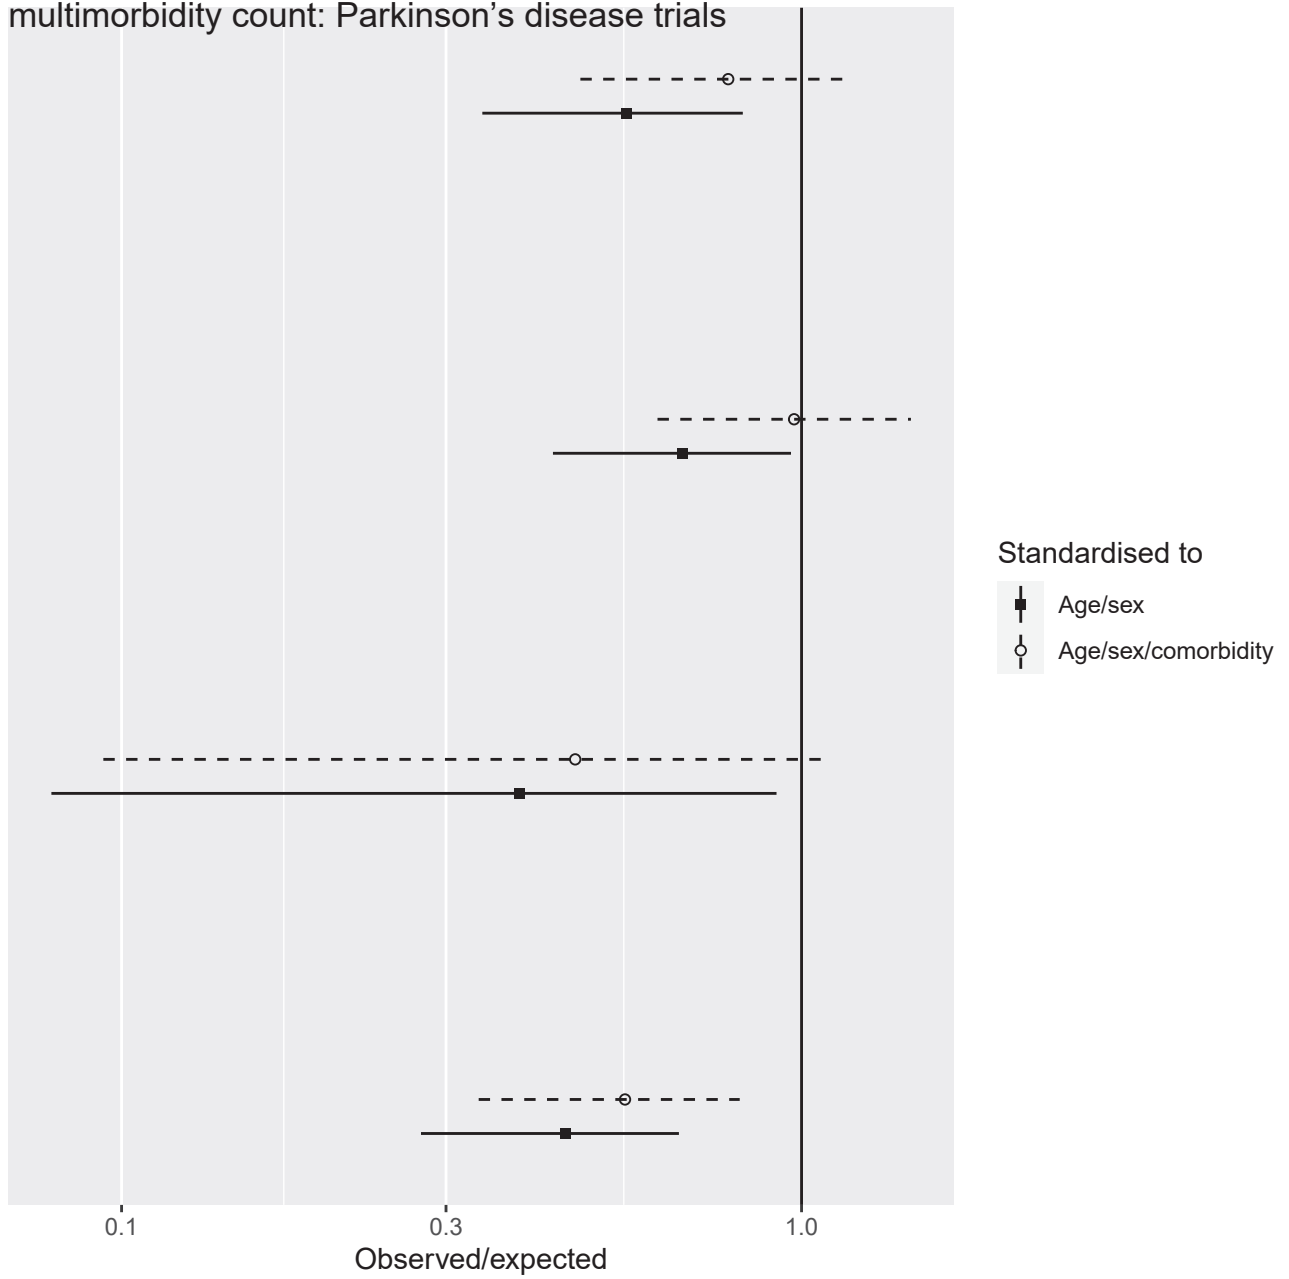

Figure S37: observed/expected SAEs before and after standardization by multimorbidity count: psoriasis trials

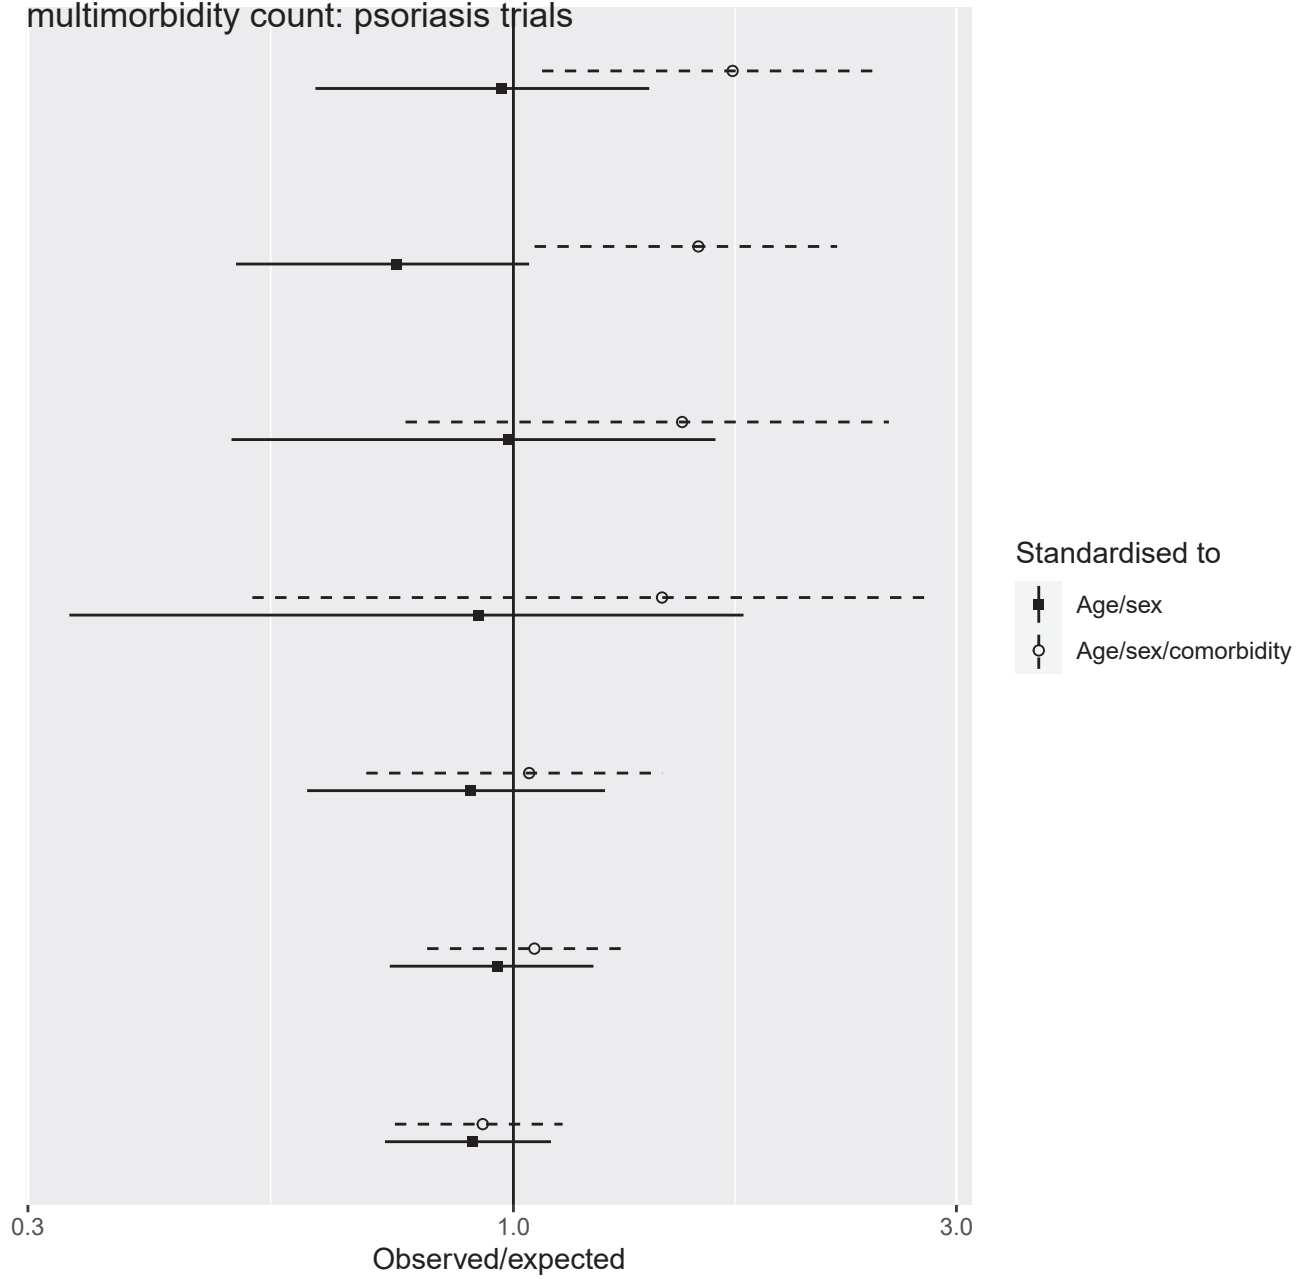

Figure S3: observed/expected SAEs before and after standardization by multimorbidity count: psoriatic arthropathy trials

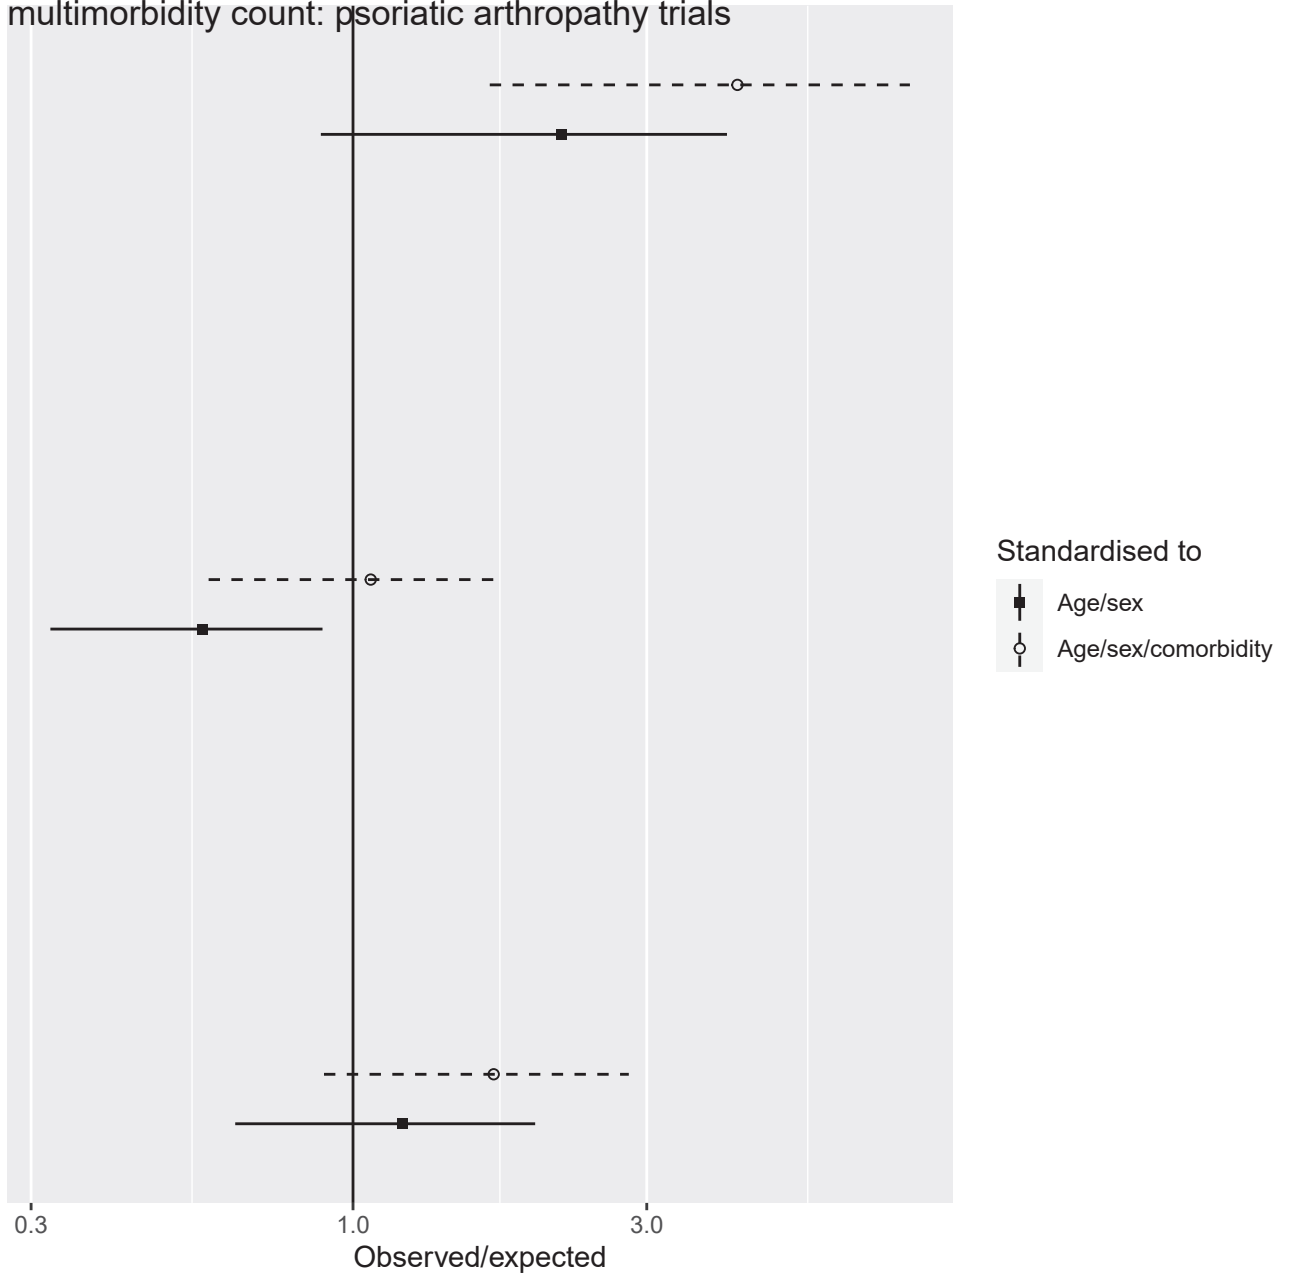



Figure S39: observed/expected SAEs before and after standardization by multimorbidity count: chronic obstructive pulmonary disease trials

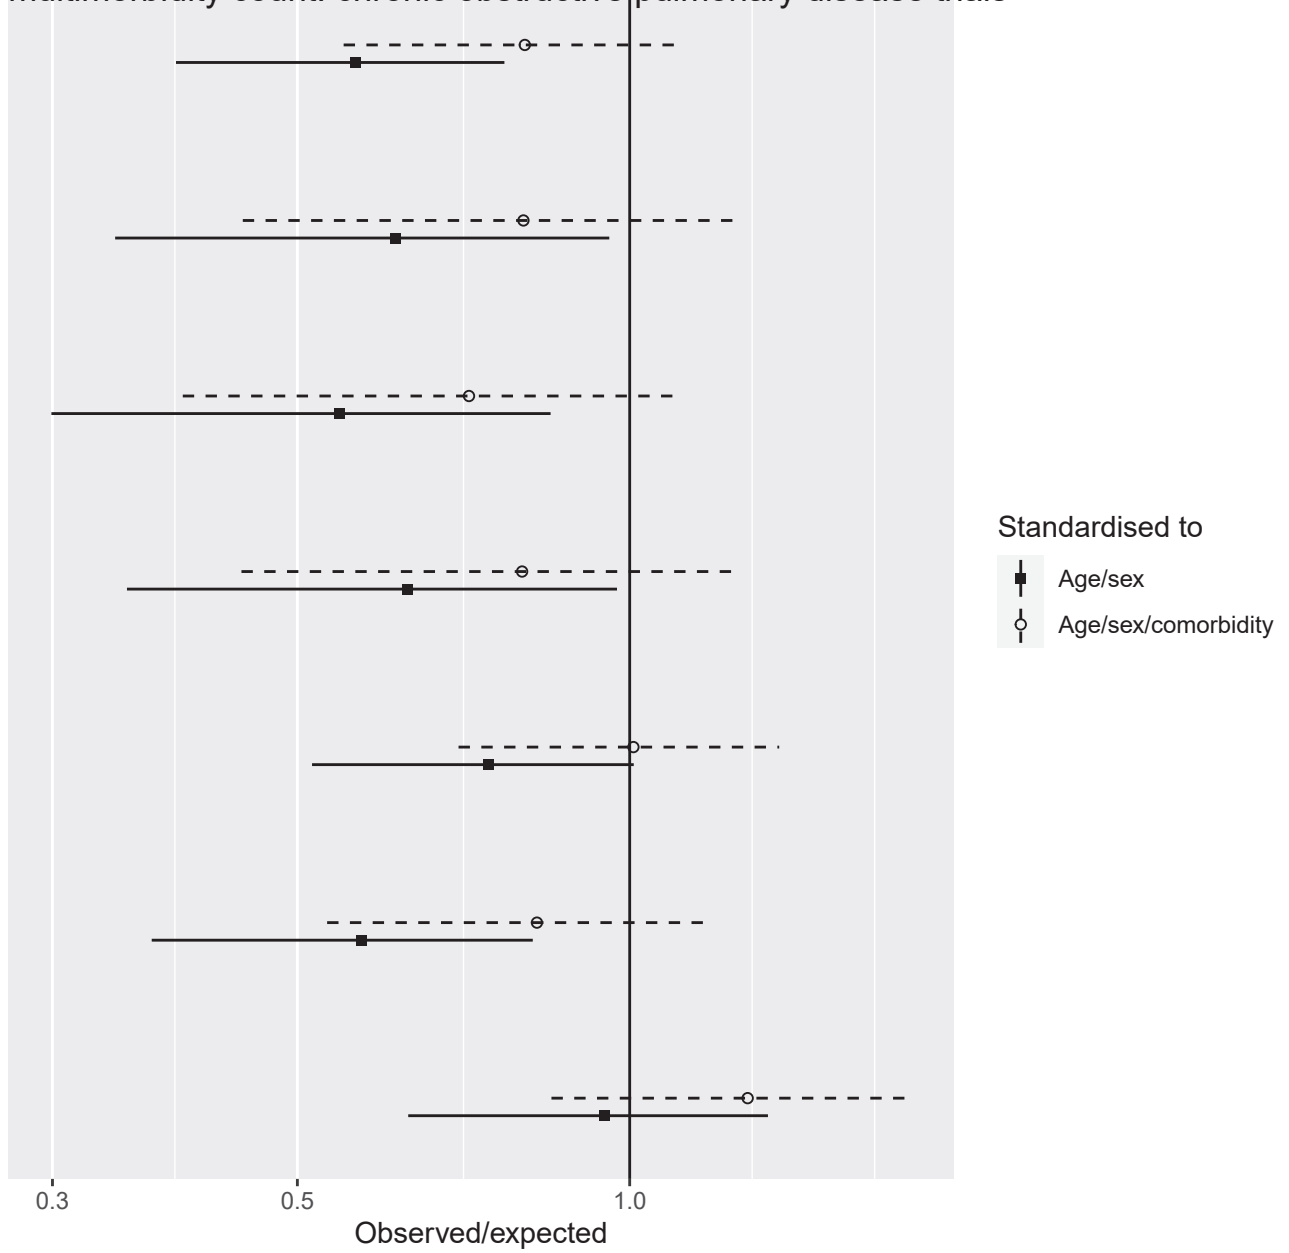

Figure S40: observed/expected SAEs before and after standardization by multimorbidity count: pulmonary fibrosis trials

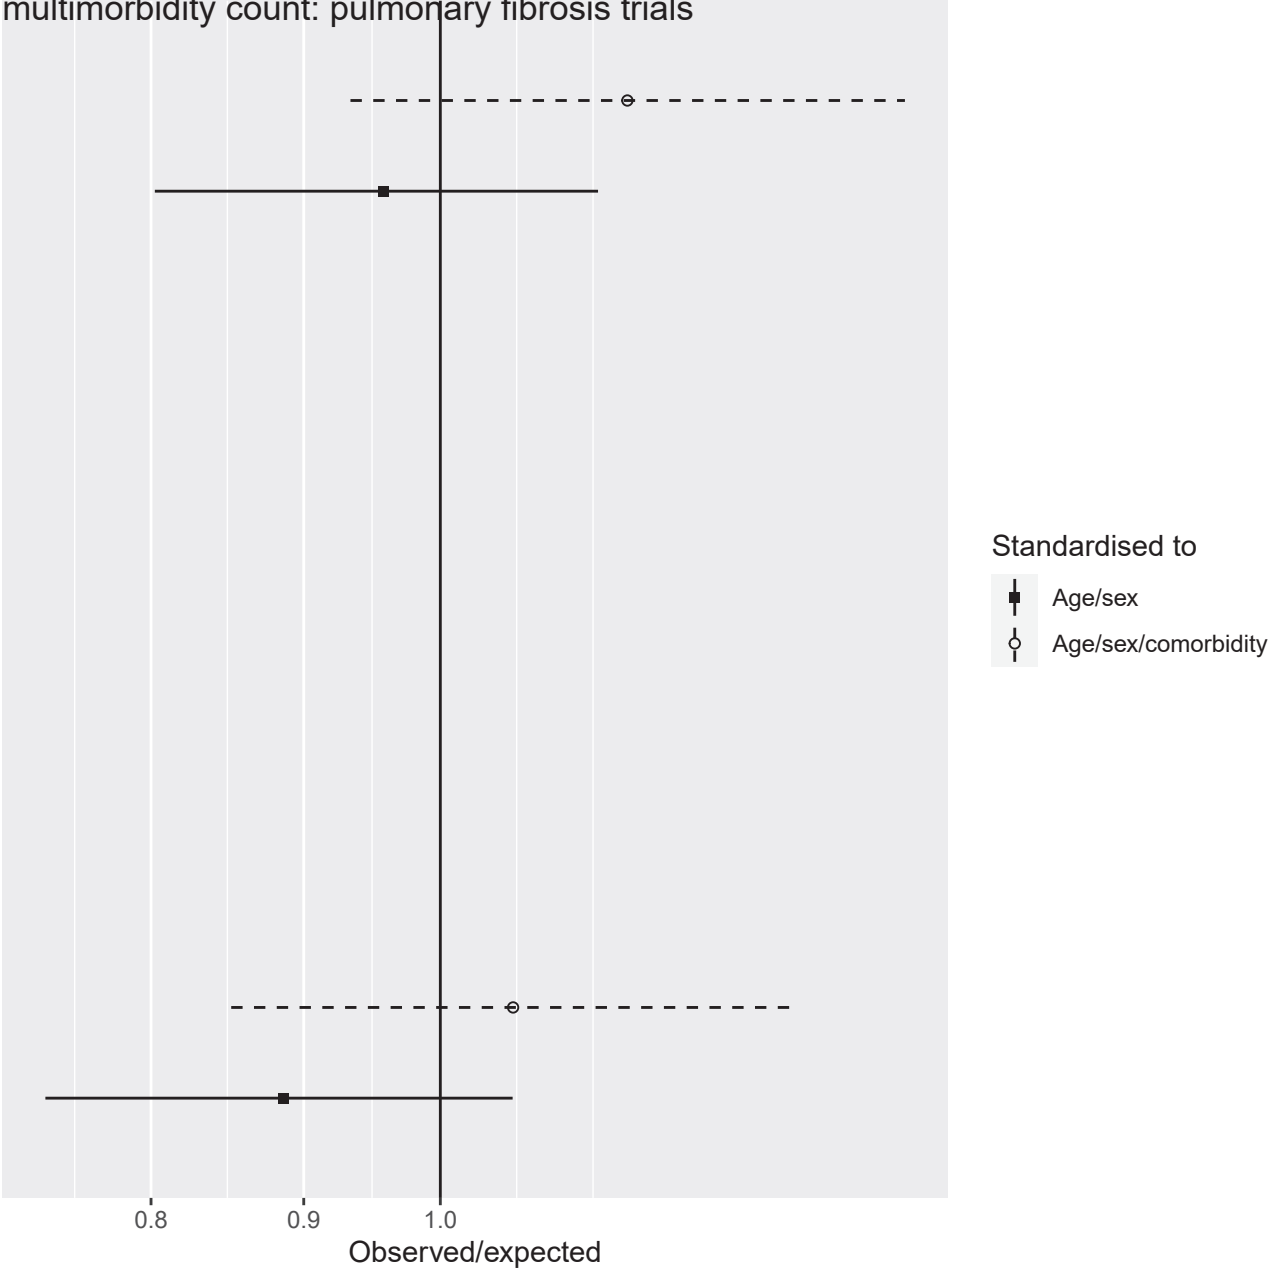

Figure S41: observed/expected SAEs before and after standardization by multimorbidity count: restless legs syndrome trials

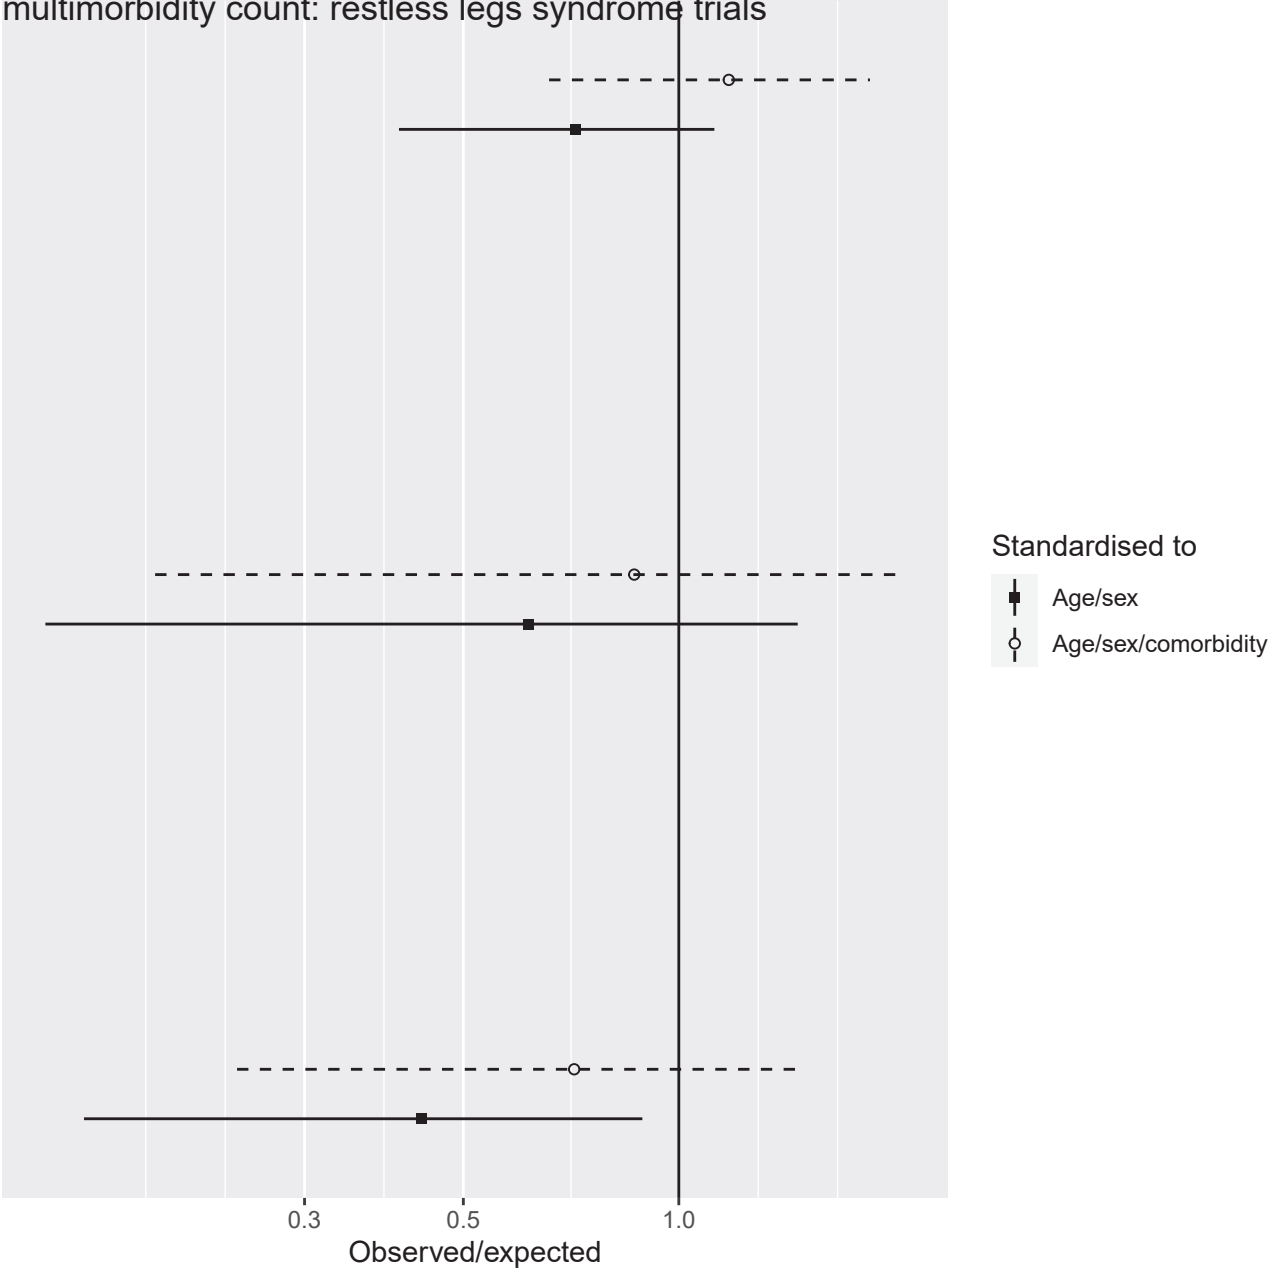

Figure S42: observed/expected SAEs before and after standardization by multimorbidity count: rheumatoid arthritis trials

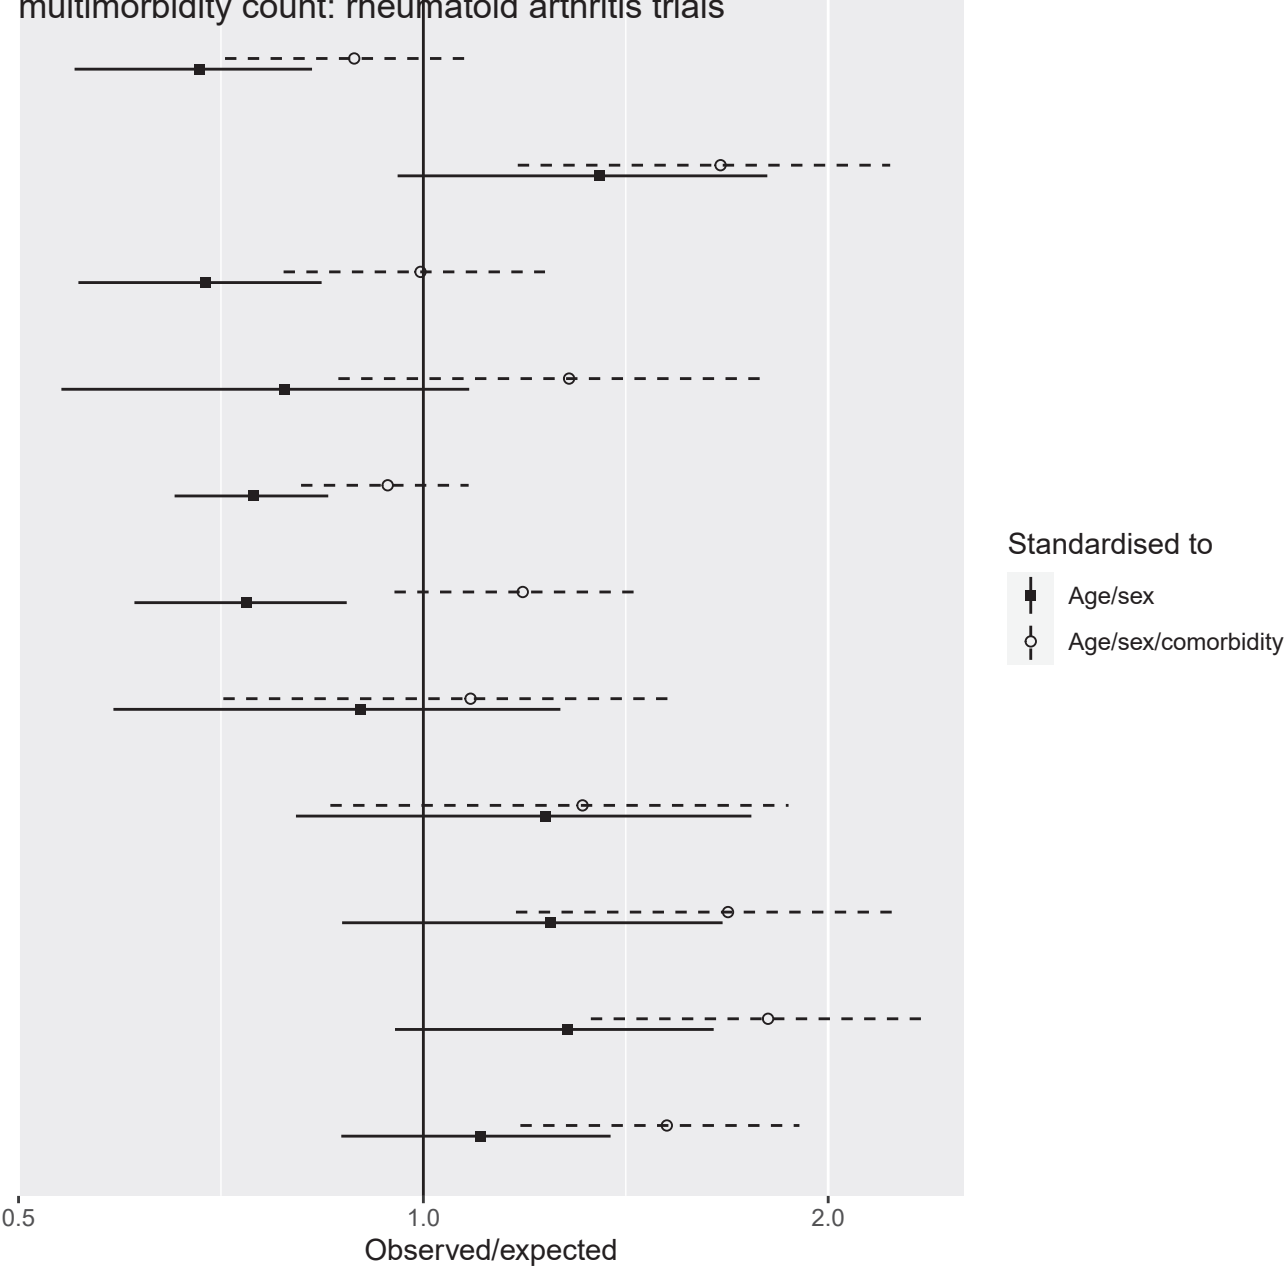

Figure S43: observed/expected SAEs before and after standardization by multimorbidity count: systemic lupus erythematosus trials

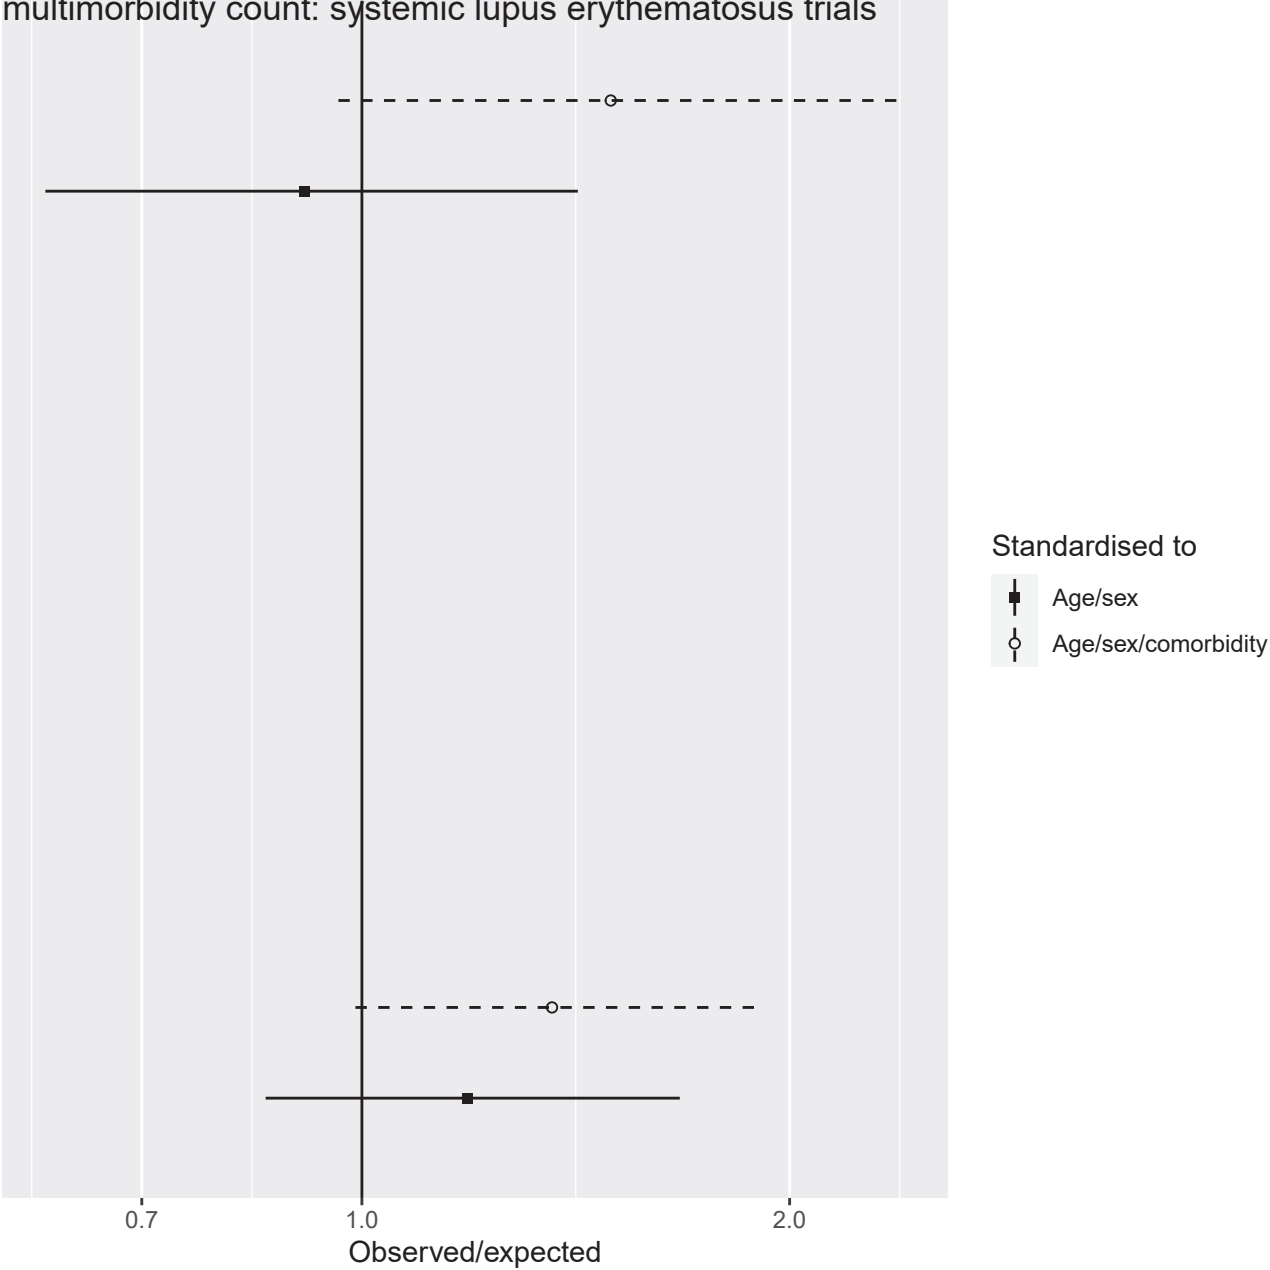

Figure S44: observed/expected SAEs before and after standardization by multimorbidity count: thromboembolism trials

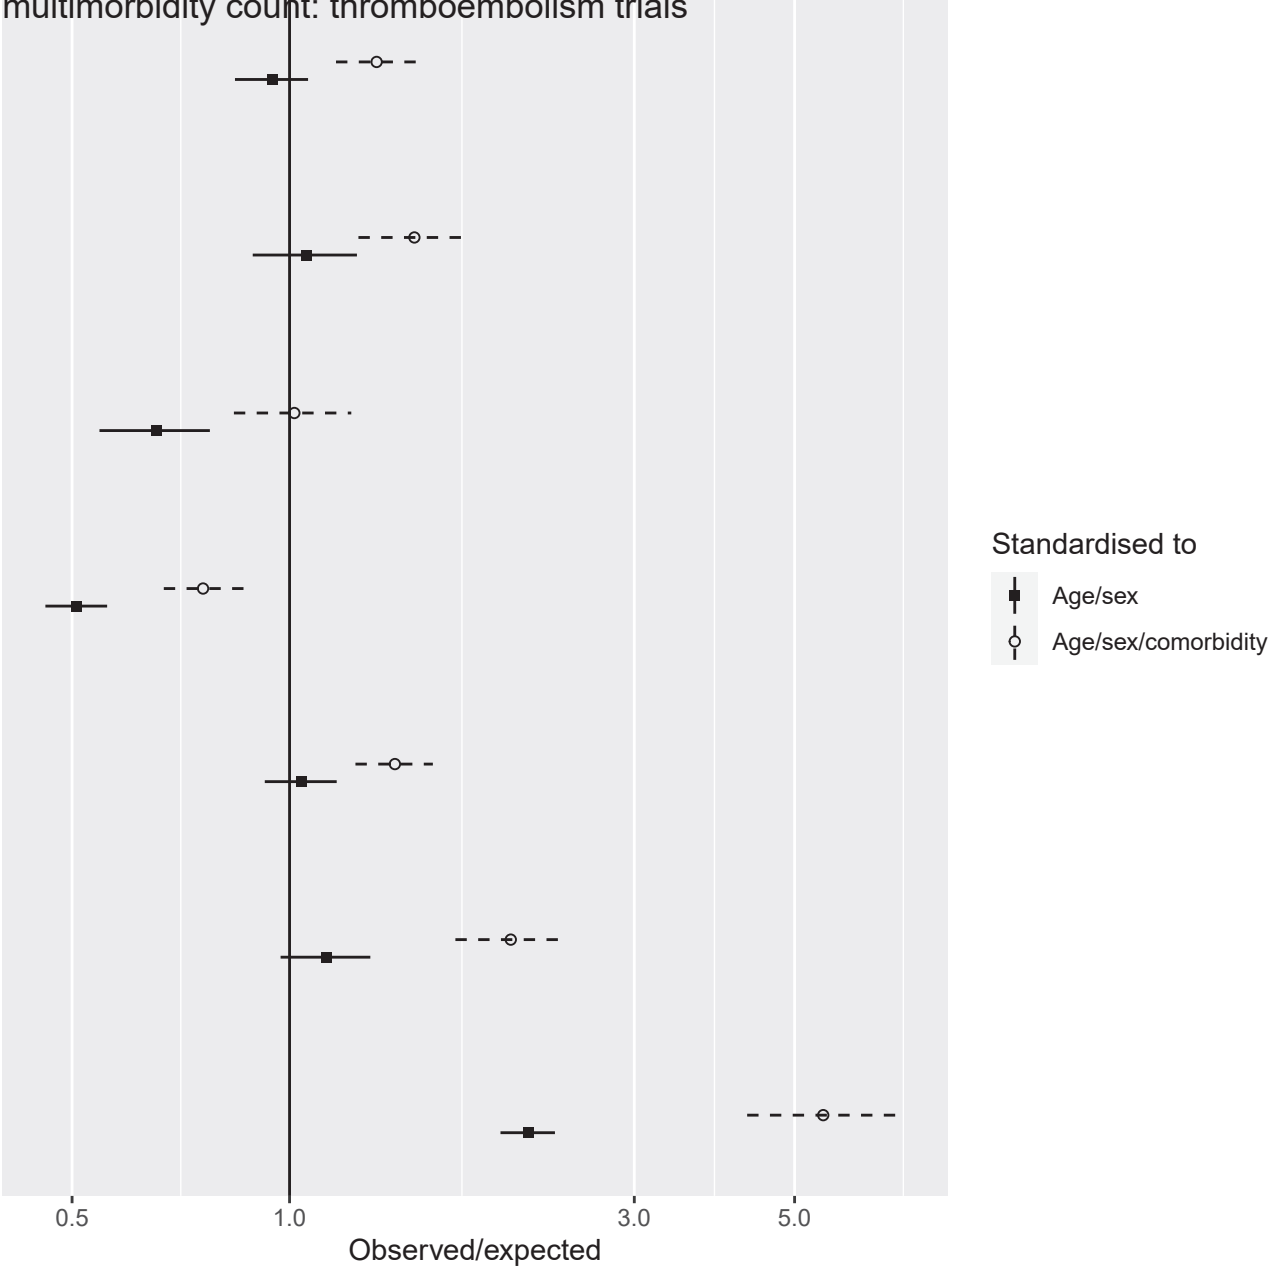

Supplement: 12916_2022_2594_MOESM3_ESM.pdf [file 12916_2022_2594_MOESM3_ESM.pdf]
