# Supplementary material for: Assessing trial representativeness using serious adverse events: an observational analysis using aggregate and individual-level data from clinical trials and routine healthcare data
Source: PubMed Central journal article supplement (PMC9615407; doi:10.1186/s12916-022-02594-9), 2022-10-28
Supplement: 12916_2022_2594_MOESM1_ESM.pdf [file 12916_2022_2594_MOESM1_ESM.pdf]

Additional file 1:  
Supplementary figures S1-S21  
Trial level estimates of observed/expected  
SAEs

Figure S1: Observed/expected SAEs in asthma trials



Figure S2: Observed/expected SAEs in atrial fibrillation trials



Figure S3: Observed/expected SAEs in axial spondyloarthritis trials



Figure S4: Observed/expected SAEs in benign prostatic hyperplasia trials



Figure S5: Observed/expected SAEs in dementia trials





Figure S7: Observed/expected SAEs in epilepsy trials



Figure S8: Observed/expected SAEs in hypertension trials



Figure S9: Observed/expected SAEs in pulmonary hypertension trials



Figure S10: Observed/expected SAEs in inflammatory bowel disease trials



Figure S11: Observed/expected SAEs in myocardial infarction trials



Figure S12: Observed/expected SAEs in osteoarthritis trials



Figure S13: Observed/expected SAEs in osteoporosis trials



Figure S14: Observed/expected SAEs in Parkinson's disease trials



Figure S15: Observed/expected SAEs in psoriasis trials



Figure S16: Observed/expected SAEs in psoriatic arthritis trials



Figure S17: Observed/expected SAEs in chronic obstructive pulmonary disease trials



Figure S18: Observed/expected SAEs in pulmonary fibrosis trials



Figure S19: Observed/expected SAEs in rheumatoid arthritis trials



Figure S20: Observed/expected SAEs in systemic lupus erythematosus trials



Figure S21: Observed/expected SAEs in thromboembolism trials
