# Supplementary material for: Assessing trial representativeness using serious adverse events: an observational analysis using aggregate and individual-level data from clinical trials and routine healthcare data
Source: PubMed Central journal article supplement (PMC9615407; doi:10.1186/s12916-022-02594-9), 2022-10-28

Additional file 2:  
Supplementary figures S22-23 -  
Comparison of SAEs between trial arms

Figure S22: Trial-level comparison of SAE rate between trial arms

Trial level

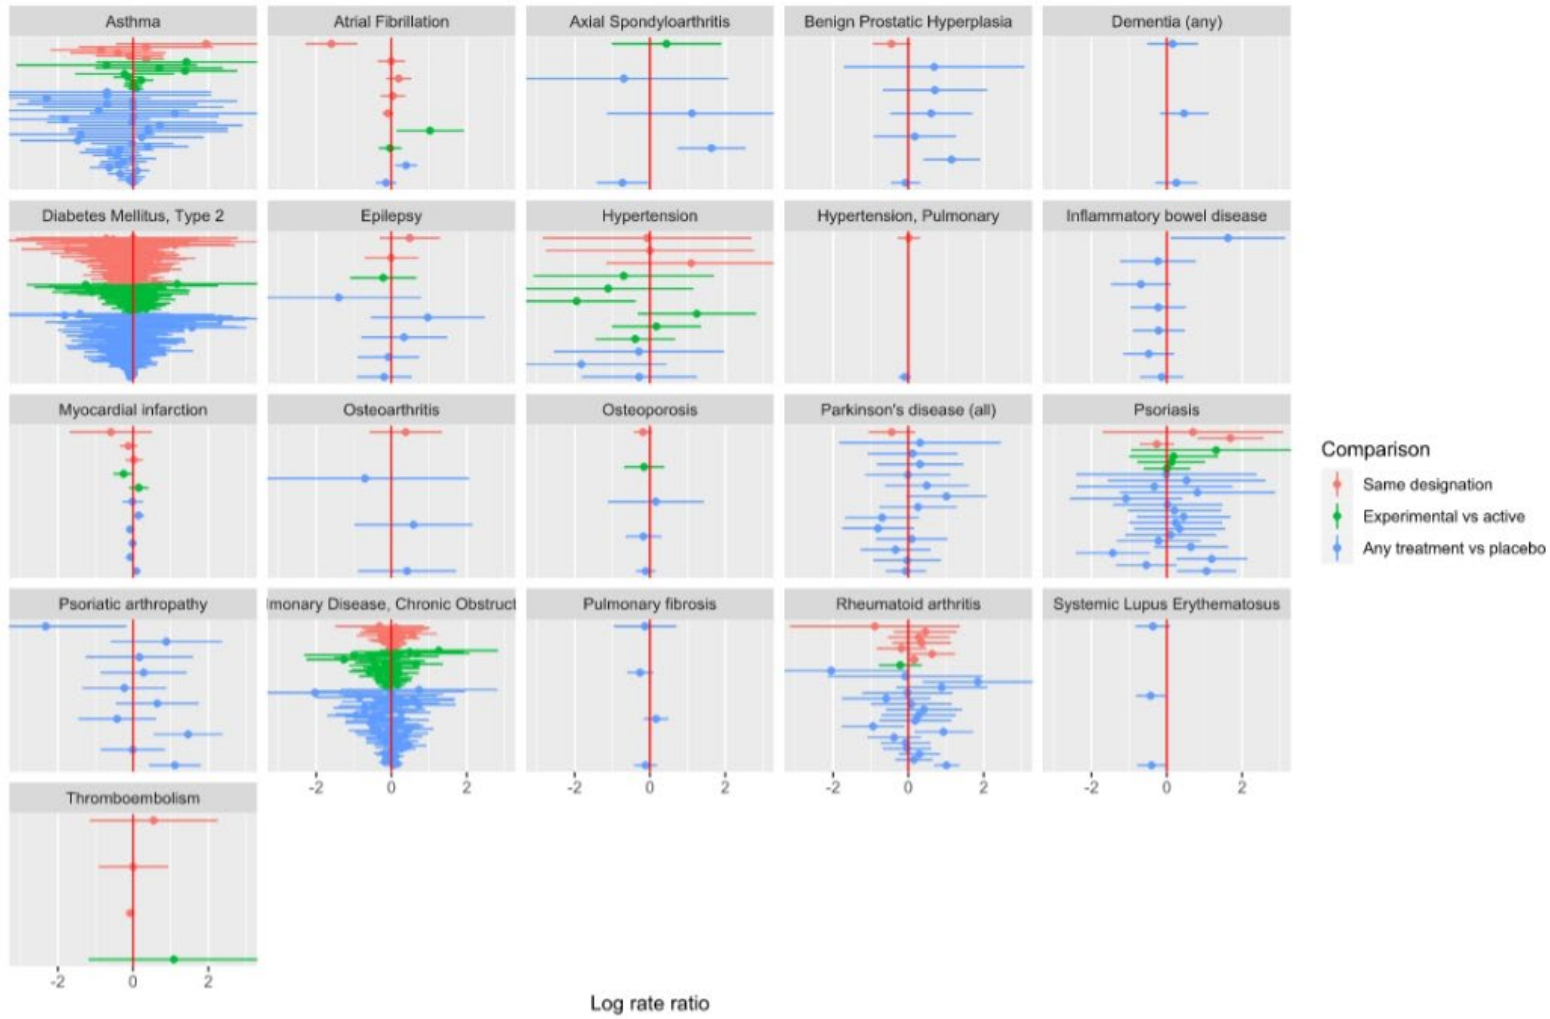

Figure S23: Index condition-level meta-analyses of comparison of SAE rate between trial arms

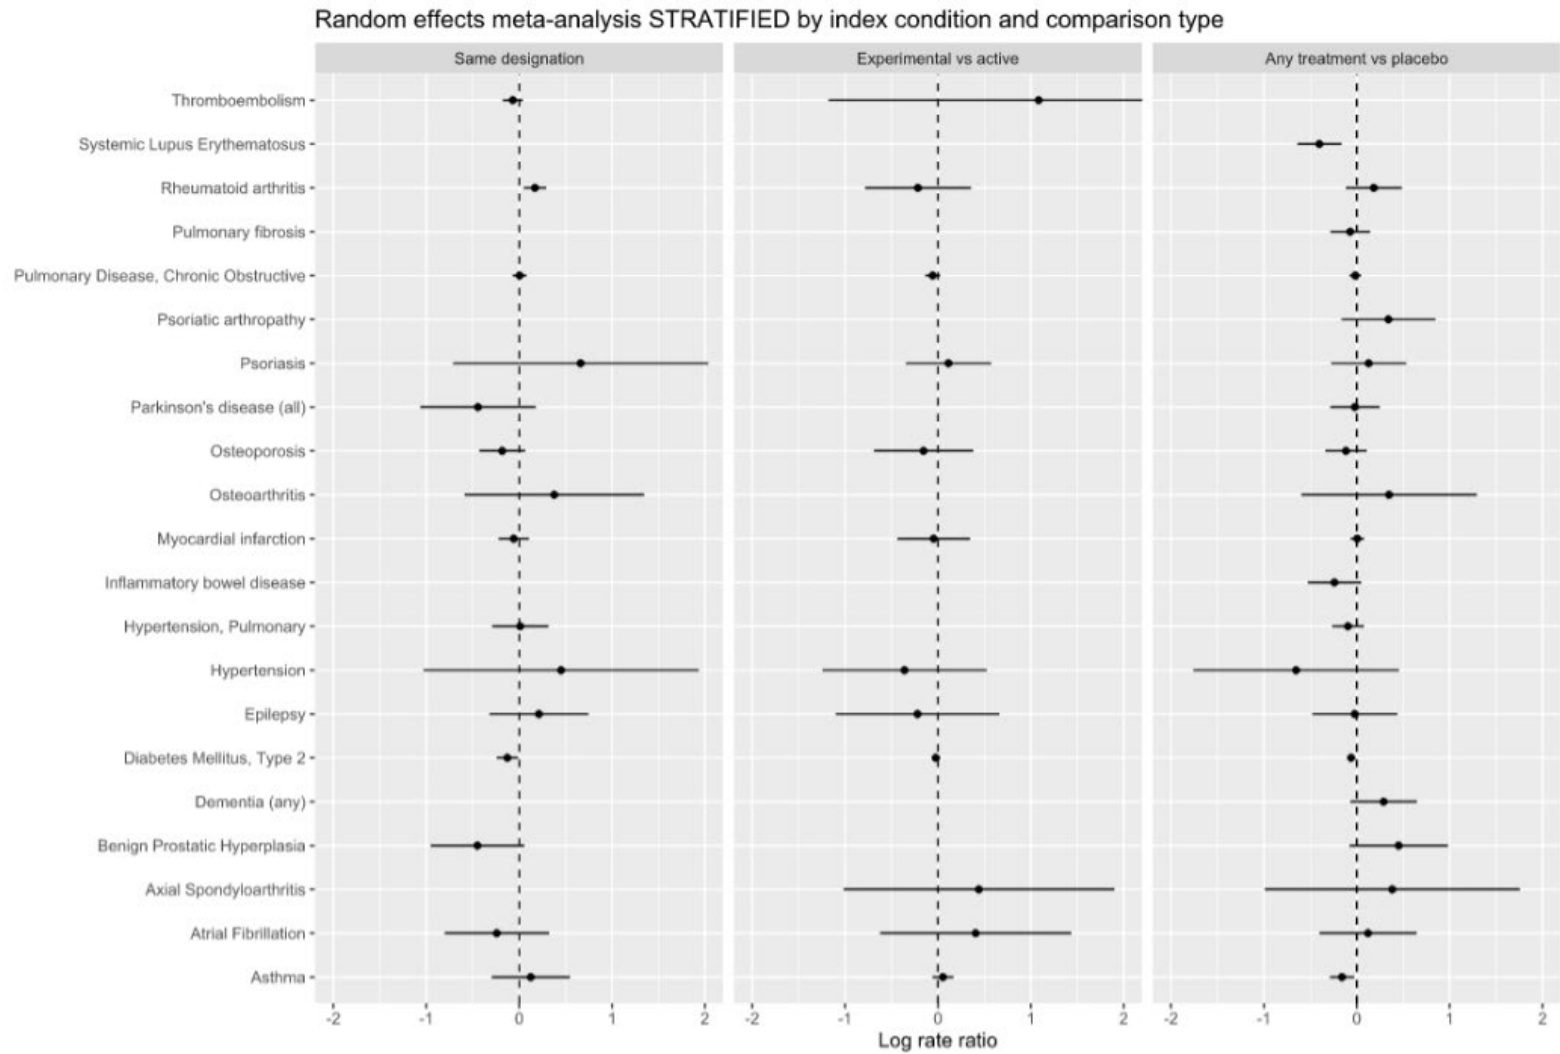

Supplement: 12916_2022_2594_MOESM2_ESM.pdf [file 12916_2022_2594_MOESM2_ESM.pdf]
